# Supplementary material for: Pyridine-grafted graphene oxide: a reusable acid–base bifunctional catalyst for the one-pot synthesis of β-phosphonomalonates via a cascade Knoevenagel–phospha Michael addition reaction in water
Source: Royal Society of Chemistry journal article supplement (doi:10.1039/c5ra13083b), 2015-01-01

## Supporting information

Pyridine-grafted graphene oxide: a reusable acid-base bifunctional catalyst for the one-pot synthesis of  $\beta$ -phosphonomalonates via cascade Knoevenogel-phospha Michael addition reaction in water

Sara Sobhani,\* Farzaneh Zarifi

Department of Chemistry, College of Sciences, University of Birjand, Birjand, Iran

\*Corresponding author. Fax: +98 56 32202065; Tel: +98 56 32202065

*E-mail address:* ssobhani@birjand.ac.ir, sobhanisara@yahoo.com

## Contents

|                                                                                    |    |
|------------------------------------------------------------------------------------|----|
| 1) General information                                                             | 2  |
| 2) General procedure for the synthesis of $\beta$ -phosphonomalonates              | 2  |
| 3) Spectral data of $\beta$ -phosphonomalonates                                    | 3  |
| 4) $^1\text{H}$ NMR and $^{13}\text{C}$ NMR spectra of $\beta$ -phosphonomalonates | 9  |
| 5) Mass spectra of $\beta$ -phosphonomalonates                                     | 24 |

## 1) General information

Chemicals were purchased from Merck Chemical Company. NMR spectra were recorded on a Bruker Advance DPX-400, 300 and 250 in CDCl<sub>3</sub> as solvent and TMS as internal standard. Mass spectra were recorded on a Shimadzu GCMS-QP5050A and Agilent Technology (HP). The purity of the products and the progress of the reactions were accomplished by TLC on silica-gel polygram SILG/UV254 plates. FT-IR spectra were recorded on a Shimadzu Fourier Transform Infrared Spectrophotometer (FT-IR-8300). TEM analysis was performed using TEM microscope (Philips CM30). Scanning electron microscopy (SEM) and energy dispersive spectroscopy (EDS) were determined by using a SEM Phenom, model PROX. Thermo gravimetric analysis (TGA) was performed using a Shimadzu thermo gravimetric analyzer (TG-50). Elemental analysis was carried out on a Costech 4010 CHNS elemental analyzer. Power X-ray diffraction (XRD) was performed on a X'Pert Pro MPD diffractometer with Cu K $\alpha$  ( $\lambda$  = 0.154 nm) radiation. The UV-Vis spectra were carried out by using a Shimadzu UV-160 A spectrophotometer.

## 2) General procedure for the synthesis of $\beta$ -phosphonomalonates

A mixture of aldehyde (1 mmol), malononitrile (1 mmol), diethyl phosphite (2 mmol) and Py-GO (3 mol%) was refluxed at 100 °C for an appropriate time (Table 2). The catalyst was separated by centrifugation. The supernatant was extracted with ethyl acetate (3  $\times$  10 mL). The organic layer was dried over anhydrous Na<sub>2</sub>SO<sub>4</sub>. The solvent was removed under reduced pressure, and the resulting product (**1-15**) was purified by chromatography on silica (*n*-hexane/EtOAc: 1/1).

### 3) Spectral data of $\beta$ -phosphonomalonates

#### [1-Phenyl-2,2-dicyanoethyl] phosphonic acid diethyl ester (1)

Yellow solid, mp 53-54 °C;  $R_f = 0.40$  (*n*-hexane/EtOAc: 1/1);  $^1\text{H}$  NMR (250 MHz,  $\text{CDCl}_3$ ):  $\delta$  1.08-1.18 (m, 3H), 1.25-1.37 (m, 3H), 3.65 (dd, 1H,  $^3J_{\text{HH}} = 8.0$ ,  $^2J_{\text{HP}} = 21.0$  Hz), 4.02-4.19 (m, 4H), 4.55 (t, 1H,  $^3J_{\text{HH}} = 8.3$  Hz), 7.43 (s, 5H) ppm;  $^{13}\text{C}$  NMR (62 MHz,  $\text{CDCl}_3$ ):  $\delta$  16.1 (d,  $^3J_{\text{CP}} = 5.6$  Hz), 16.2 (d,  $^3J_{\text{CP}} = 5.6$  Hz), 25.5, 44.6 (d,  $^1J_{\text{CP}} = 144.0$  Hz), 63.4 (d,  $^2J_{\text{CP}} = 7.5$  Hz), 64.4 (d,  $^2J_{\text{CP}} = 7.0$  Hz), 111.1 (d,  $^3J_{\text{CP}} = 12.5$  Hz), 111.3 (d,  $^3J_{\text{CP}} = 10.0$  Hz), 129.1, 129.2, 129.3, 129.4, 129.5, 129.6 ppm; MS (70 eV):  $m/z = 292$  [5%,  $\text{M}^+$ ], 155 [18%,  $\text{M}^+ - \text{P}(\text{O})(\text{OEt})_2$ ], 129 {100%,  $\text{M}^+ - [\text{P}(\text{O})(\text{OEt})_2$  and CN]}.

#### [1-(4-Methyl)-2,2-dicyanoethyl] phosphonic acid diethyl ester (2)

Yellow solid, mp 97 °C;  $R_f = 0.44$  (*n*-hexane/EtOAc: 1/1);  $^1\text{H}$  NMR (400 MHz,  $\text{CDCl}_3$ ):  $\delta$  1.16 (t, 3H,  $^3J_{\text{HH}} = 7.2$  Hz), 1.38 (t, 3H,  $^3J_{\text{HH}} = 7.2$  Hz), 2.39 (s, 3H), 3.57 (dd, 1H,  $^3J_{\text{HH}} = 8.0$  Hz,  $^2J_{\text{HP}} = 21.2$  Hz), 3.74-3.84 (m, 1H), 3.99-4.08 (m, 1H), 4.14-4.24 (m, 2H), 4.50 (dd, 1H,  $^3J_{\text{HH}} = 8.4$  Hz,  $^3J_{\text{HP}} = 9.0$  Hz), 7.28 (d, 2H,  $^3J_{\text{HH}} = 8.0$  Hz), 7.38 (d, 2H,  $^3J_{\text{HH}} = 8.4$  Hz) ppm;  $^{13}\text{C}$  NMR (75 MHz,  $\text{CDCl}_3$ ):  $\delta$  16.1 (d, 2H,  $^3J_{\text{CP}} = 5.2$  Hz), 16.2 (d, 2H,  $^3J_{\text{CP}} = 6.0$  Hz), 21.2, 25.6, 44.2 (d,  $^1J_{\text{CP}} = 143.2$  Hz), 63.3 (d,  $^2J_{\text{CP}} = 7.5$  Hz), 64.3 (d,  $^2J_{\text{CP}} = 7.5$  Hz), 111.3 (d,  $^3J_{\text{CP}} = 12.7$  Hz), 111.5 (d,  $^3J_{\text{CP}} = 10.5$  Hz), 127.1 (d,  $J_{\text{CP}} = 6.0$  Hz), 129.1 (d,  $J_{\text{CP}} = 6.0$  Hz), 130.1, 139.5 ppm; MS (70 eV):  $m/z = 306$  [6%,  $\text{M}^+$ ], 169 [7%,  $\text{M}^+ - \text{P}(\text{O})(\text{OEt})_2$ ], 143 {100%,  $\text{M}^+ - [\text{P}(\text{O})(\text{OEt})_2$  and CN]}.

#### [1-(4-Methoxy)-2,2-dicyanoethyl] phosphonic acid diethyl ester (3)

Yellow solid, mp 61 °C;  $R_f = 0.50$  (*n*-hexane/EtOAc: 1/1);  $^1\text{H}$  NMR (400 MHz,  $\text{CDCl}_3$ ):  $\delta$  1.16 (t, 3H,  $^3J_{\text{HH}} = 7.2$  Hz), 1.37 (t, 3H,  $^3J_{\text{HH}} = 7.2$  Hz), 3.57 (dd, 1H,  $^3J_{\text{HH}} = 8.0$  Hz,  $^2J_{\text{HP}} = 21.2$  Hz), 3.84 (s, 3H), 4.00-4.24 (m, 4H), 4.51 (dd, 1H,  $^3J_{\text{HH}} = 8.0$  Hz,  $^3J_{\text{HP}} = 8.8$  Hz), 6.97 (d, 2H,  $^3J_{\text{HH}} = 8.8$  Hz), 7.42 (d, 2H,  $^3J_{\text{HH}} = 8.8$  Hz) ppm;  $^{13}\text{C}$  NMR (75 MHz,  $\text{CDCl}_3$ ):  $\delta$  16.0 (d,  $^3J_{\text{CP}} = 6.7$  Hz),

16.2 (d,  $^3J_{CP} = 6.0$  Hz), 25.5, 44.3 (d,  $^1J_{CP} = 142.5$  Hz), 55.2, 63.3 (d,  $^2J_{CP} = 6.0$  Hz), 64.2 (d,  $^2J_{CP} = 6.7$  Hz), 111.4 (d,  $^3J_{CP} = 8.2$  Hz), 114.5 (d,  $^3J_{CP} = 6.0$  Hz), 121.4 (d,  $J_{CP} = 8.2$  Hz), 130.3, 131.8, 160.0 ppm; MS (70 eV):  $m/z = 323$  [4%,  $M^+ + 1$ ], 322 [23%,  $M^+$ ], 185 [18%,  $M^+ - P(O)(OEt)_2$ ] 121 {100%,  $M^+ - [P(O)(OEt)_2$  and  $CH(CN)_2$ ]}.  
CCOP(=O)(OCC)C#N

#### **[1-(3-Methoxyphenyl)-2,2-dicyanoethyl] phosphonic acid diethyl ester (4)**

Yellow liquid;  $R_f = 0.50$  (*n*-hexane/EtOAc: 1/1);  $^1H$  NMR (250 MHz,  $CDCl_3$ ):  $\delta$  1.10 (t, 3H,  $^3J_{HH} = 6.7$  Hz), 1.31 (t, 3H,  $^3J_{HH} = 6.5$  Hz), 3.56 (dd, 1H,  $^3J_{HH} = 7.8$  Hz,  $^2J_{HP} = 21.0$  Hz), 3.78 (s, 3H), 3.94-4.15 (m, 4H), 4.56 (t, 1H,  $^3J_{HH} = 8.0$  Hz), 6.91 (d, 2H,  $^3J_{HH} = 7.5$  Hz), 7.00 (s, 1H), 7.30 (t, 1H,  $^3J_{HH} = 7.5$  Hz) ppm;  $^{13}C$  NMR (62 MHz,  $CDCl_3$ ):  $\delta$  16.1 (d,  $^3J_{CP} = 6.3$  Hz), 16.2 (d,  $^3J_{CP} = 6.9$  Hz), 25.5, 44.5 (d,  $^1J_{CP} = 144.9$  Hz), 55.3, 63.4 (d,  $^2J_{CP} = 7.6$  Hz), 64.4 (d,  $^2J_{CP} = 6.9$  Hz), 111.2 (d,  $^3J_{CP} = 11.2$  Hz), 111.3 (d,  $^3J_{CP} = 10.0$  Hz), 114.9 (d,  $J_{CP} = 6.8$  Hz), 121.4, 130.4, 131.6, 160.0, 160.3 ppm; MS (70 eV):  $m/z = 323$  [3%,  $M^+ + 1$ ], 322 [13%,  $M^+$ ], 185 [8%,  $M^+ - P(O)(OEt)_2$ ], 121 {100%,  $M^+ - [P(O)(OEt)_2$  and  $CH(CN)_2$ ]}.  
CCOP(=O)(OCC)C#N

#### **[1-(4-Chlorophenyl)-2,2-dicyanoethyl] phosphonic acid diethyl ester (5)**

Yellow solid, mp 98°C;  $R_f = 0.53$  (*n*-hexane/EtOAc: 1/1);  $^1H$  NMR (250 MHz,  $CDCl_3$ ):  $\delta$  1.16 (t, 3H,  $^3J_{HH} = 7.0$  Hz), 1.33 (t, 3H,  $^3J_{HH} = 7.0$  Hz), 3.62 (dd, 1H,  $^3J_{HH} = 7.5$  Hz,  $^2J_{HP} = 21.5$  Hz), 3.82-4.19 (m, 4H), 4.55 (t, 1H,  $^3J_{HH} = 7.7$  Hz), 7.42 (s, 4H) ppm;  $^{13}C$  NMR (62 MHz,  $CDCl_3$ ):  $\delta$  16.1 (d,  $^3J_{CP} = 5.0$  Hz), 16.2 (d,  $^3J_{CP} = 5.6$  Hz), 25.5, 43.9 (d,  $^1J_{CP} = 144.7$  Hz), 63.5 (d,  $^2J_{CP} = 7.0$  Hz), 64.4 (d,  $^2J_{CP} = 7.0$  Hz), 111.0 (d,  $^3J_{CP} = 11.9$  Hz), 111.2 (d,  $^3J_{CP} = 11.3$  Hz), 128.8, 129.6, 130.7, 135.7 ppm; MS (70 eV):  $m/z = 326$  [16%,  $M^+$ ], 328 [5%,  $M^+ + 2$ ], 189 [31%,  $M^+ - P(O)(OEt)_2$ ], 191 [10%, ( $M^+ + 2$ ) -  $P(O)(OEt)_2$ ], 163 {100%,  $M^+ - [P(O)(OEt)_2$  and  $CN$ ]}, 165 [33%, ( $M^+ + 2$ ) -  $P(O)(OEt)_2$  and  $CN$ ].  
CCOP(=O)(OCC)C#N

#### **[1-(3-Chlorophenyl)-2,2-dicyanoethyl] phosphonic acid diethyl ester (6)**

Yellow liquid;  $R_f = 0.56$  (*n*-hexane/EtOAc: 1/1);  $^1\text{H}$  NMR (400 MHz,  $\text{CDCl}_3$ ):  $\delta$  1.19 (t, 3H,  $^3J_{\text{HH}} = 7.2$  Hz), 1.38 (t, 3H,  $^3J_{\text{HH}} = 7.2$  Hz), 3.60 (dd, 1H,  $^3J_{\text{HH}} = 8.0$  Hz,  $^2J_{\text{HP}} = 21.2$  Hz), 3.83-3.93 (m, 1H), 4.03-4.26 (m, 3H), 4.56 (dd, 1H,  $^3J_{\text{HH}} = 8.0$  Hz,  $^3J_{\text{HP}} = 9.2$  Hz), 7.41-7.44 (m, 3H), 7.49 (s, 1H) ppm;  $^{13}\text{C}$  NMR (75 MHz,  $\text{CDCl}_3$ ):  $\delta$  16.0 (d,  $^3J_{\text{CP}} = 5.2$  Hz), 16.2 (d,  $^3J_{\text{CP}} = 6.0$  Hz), 25.3, 43.8 (d,  $^1J_{\text{CP}} = 142.5$  Hz), 63.6 (d,  $^2J_{\text{CP}} = 6.7$  Hz), 64.4 (d,  $^2J_{\text{CP}} = 6.7$  Hz), 111.3 (d,  $^3J_{\text{CP}} = 12.0$  Hz), 111.4 (d,  $^3J_{\text{CP}} = 12.0$  Hz), 127.5 (d,  $J_{\text{CP}} = 6.7$  Hz), 129.5 (d,  $J_{\text{CP}} = 6.7$  Hz), 129.6, 130.6, 132.6 (d,  $J_{\text{CP}} = 6.0$  Hz), 135.0 ppm, MS (70 eV):  $m/z = 326$  [12%,  $\text{M}^+$ ], 328 [4%,  $\text{M}^+ + 2$ ], 163 {100%,  $\text{M}^+ - [\text{P}(\text{O})(\text{OEt})_2$  and  $\text{CN}]$ }, 165 {33%,  $(\text{M}^+ + 2) - [\text{P}(\text{O})(\text{OEt})_2$  and  $\text{CN}]$ }.

**[1-(2-Chlorophenyl)-2,2-dicyanoethyl] phosphonic acid diethyl ester (7)**

Yellow solid, mp 77 °C;  $R_f = 0.57$  (*n*-hexane/EtOAc: 1/1);  $^1\text{H}$  NMR (250 MHz,  $\text{CDCl}_3$ ):  $\delta$  1.11 (t, 3H,  $^3J_{\text{HH}} = 7.0$  Hz), 1.35 (t, 3H,  $^3J_{\text{HH}} = 7.0$  Hz), 3.75-4.30 (m, 4H), 4.46 (dd, 1H,  $^3J_{\text{HH}} = 8.2$ ,  $^2J_{\text{HP}} = 21.2$  Hz), 4.61 (t, 1H,  $^3J_{\text{HH}} = 8.5$  Hz), 7.35 (d, 2H,  $^3J_{\text{HH}} = 4$  Hz), 7.47 (s, 1H), 7.75 (d, 1H,  $^3J_{\text{HH}} = 5.3$  Hz) ppm;  $^{13}\text{C}$  NMR (75 MHz,  $\text{CDCl}_3$ ):  $\delta$  15.9 (d,  $^3J_{\text{CP}} = 6.0$  Hz), 16.1 (d,  $^3J_{\text{CP}} = 6.0$  Hz), 24.8, 43.7 (d,  $^1J_{\text{CP}} = 142.5$  Hz), 63.5 (d,  $^2J_{\text{CP}} = 7.5$  Hz), 64.3 (d,  $^2J_{\text{CP}} = 7.5$  Hz), 111.2 (d,  $^3J_{\text{CP}} = 11.2$  Hz), 113.8 (d,  $^3J_{\text{CP}} = 11.2$  Hz), 127.7, 128.7, 129.6, 130.3, 130.5, 135.0 ppm, ; MS (70 eV):  $m/z = 327$  [100%,  $\text{M}^+ + 1$ ], 329 [26%,  $\text{M}^+ + 3$ ], 291 [84%,  $\text{M}^+ - \text{Cl}$ ], 189 [15%,  $\text{M}^+ - \text{P}(\text{O})(\text{OEt})_2$ ], 191 [5%,  $(\text{M}^+ + 2) - \text{P}(\text{O})(\text{OEt})_2$ ], 163 {6%,  $\text{M}^+ - [\text{P}(\text{O})(\text{OEt})_2$  and  $\text{CN}]$ }, 165 {3%,  $(\text{M}^+ + 2) - \text{P}(\text{O})(\text{OEt})_2$  and  $\text{CN}]$ }.

**[1-(4-Bromophenyl)-2,2-dicyanoethyl] phosphonic acid diethyl ester (8)**

White solid, mp 102 °C;  $R_f = 0.44$  (*n*-hexane/EtOAc: 1/1);  $^1\text{H}$ NMR (250 MHz,  $\text{CDCl}_3$ ):  $\delta$  1.16 (t, 3H,  $^3J_{\text{HH}} = 7.0$  Hz), 1.33 (t, 3H,  $^3J_{\text{HH}} = 7.0$  Hz), 3.58 (dd, 1H,  $^3J_{\text{HH}} = 7.5$  Hz,  $^2J_{\text{HP}} = 21.5$  Hz), 3.79-4.18 (m, 4H), 4.56 (t, 1H,  $^3J_{\text{HH}}$ ,  $^3J_{\text{HP}} = 7.7$  Hz), 7.36 (d, 2H,  $^3J_{\text{HH}} = 8.2$  Hz), 7.56 (d, 2H,  $^3J_{\text{HH}} = 8.0$  Hz) ppm;  $^{13}\text{C}$  NMR (62 MHz,  $\text{CDCl}_3$ ):  $\delta$  16.1 (d,  $^3J_{\text{CP}} = 4.4$  Hz), 16.2 (d,  $^3J_{\text{CP}} = 5.7$

Hz), 25.4, 43.9 (d,  $^1J_{CP} = 144.7$  Hz), 63.6 (d,  $^2J_{CP} = 7.5$  Hz), 64.4 (d,  $^2J_{CP} = 7.5$  Hz), 111.0 (d,  $^3J_{CP} = 11.9$  Hz), 111.2 (d,  $^3J_{CP} = 10.7$  Hz), 123.9, 129.4, 131.0, 132.5 ppm; MS (70 eV):  $m/z = 370$  [7%,  $M^+$ ], 372 [8%,  $M^+ + 2$ ], 233 [12%,  $M^+ - P(O)(OEt)_2$ ], 235 [12%,  $(M^+ + 2) - P(O)(OEt)_2$ ], 207 {99%,  $M^+ - P(O)(OEt)_2$  and CN}], 209 {100%,  $(M^+ + 2) - P(O)(OEt)_2$  and CN]}.

### **[1-(3-Bromophenyl)-2,2-dicyanoethyl] phosphonic acid diethyl ester (9)**

White solid, mp 78-79 °C;  $R_f = 0.46$  (*n*-hexane/EtOAc: 1/1);  $^1H$ NMR (400 MHz,  $CDCl_3$ ):  $\delta$  1.14 (t, 3H,  $^3J_{HH} = 7.2$  Hz), 1.31 (t, 3H,  $^3J_{HH} = 7.2$  Hz), 3.65 (dd, 1H,  $^3J_{HH} = 7.6$  Hz,  $^2J_{HP} = 21.6$  Hz), 3.85-4.17 (m, 4H), 4.70 (dd, 1H,  $^3J_{HH} = 8.0$  Hz,  $^2J_{HP} = 9.2$  Hz), 7.27 (t, 1H,  $^3J_{HH} = 8.0$  Hz), 7.43 (d, 1H,  $^3J_{HH} = 7.2$  Hz), 7.51 (d, 1H,  $^3J_{HH} = 8.0$  Hz), 7.62 (s, 1H) ppm;  $^{13}C$  NMR (100 MHz,  $CDCl_3$ ):  $\delta$  16.1 (d,  $^3J_{CP} = 5.0$  Hz), 16.2 (d,  $^3J_{CP} = 6.0$  Hz), 25.3, 43.8 (d,  $^1J_{CP} = 143.0$  Hz), 63.6 (d,  $^2J_{CP} = 7.0$  Hz), 64.4 (d,  $^2J_{CP} = 7.0$  Hz), 111.3 (d,  $^3J_{CP} = 12.1$  Hz), 111.4 (d,  $^3J_{CP} = 11.1$  Hz), 123.1, 127.9 (d,  $J_{CP} = 6.0$  Hz), 130.8, 132.4 (d,  $J_{CP} = 6.0$  Hz), 132.6, 132.8 (d,  $J_{CP} = 6.0$  Hz) ppm; MS (70 eV):  $m/z = 370$  [7%,  $M^+$ ], 372 [7%,  $M^+ + 2$ ], 234 [7%,  $M^+ - P(O)(OEt)_2$ ], 236 [6%,  $(M^+ + 2) - P(O)(OEt)_2$ ], 207 {56%,  $M^+ - P(O)(OEt)_2$  and CN}], 209 {57%,  $(M^+ + 2) - P(O)(OEt)_2$  and CN}], 137 [100%,  $P(O)(OEt)_2$ ].

### **[1-(4-Hydroxyphenyl)-2,2-dicyanoethyl] phosphonic acid diethyl ester (10)**

Yellow solid, mp 129-131 °C;  $R_f = 0.55$  (*n*-hexane/EtOAc: 1/1);  $^1H$  NMR (250 MHz,  $CDCl_3$ ):  $\delta$  1.19 (t, 3H,  $^3J_{HH} = 7.0$  Hz), 1.38 (t, 3H,  $^3J_{HH} = 7.0$  Hz), 3.53 (dd, 1H,  $^3J_{HH} = 7.8$  Hz,  $^2J_{HP} = 21.3$  Hz), 3.79-4.23 (m, 4H), 4.43 (t, 1H,  $^3J_{HH}$ ,  $^3J_{HP} = 8.0$  Hz), 6.76 (d, 2H,  $^3J_{HH} = 8.4$  Hz), 7.25 (d, 2H,  $^3J_{HH} = 8.4$  Hz) ppm;  $^{13}C$  NMR (75 MHz,  $CDCl_3$ ):  $\delta$  16.1 (d,  $^3J_{CP} = 5.2$  Hz), 16.2 (d,  $^3J_{CP} = 5.2$  Hz), 25.7, 43.7 (d,  $^1J_{CP} = 145.5$  Hz), 63.8 (d,  $^2J_{CP} = 7.5$  Hz), 64.7 (d,  $^2J_{CP} = 6.8$  Hz), 111.2 (d,  $^3J_{CP} = 12.7$  Hz), 111.3 (d,  $^3J_{CP} = 9.7$  Hz), 116.6, 120.4 (d,  $J_{CP} = 6.0$  Hz), 130.6 (d,  $J_{CP} = 6.0$  Hz),

157.8 ppm; MS (70 eV):  $m/z = 308$  [36%,  $M^+$ ], 243 [89%,  $M^+ - CH(CN)_2$ ], 215 [88%,  $M^+ - (C_6H_4OH)$ ], 171 [31%, ( $M^+ - P(O)(OEt)_2$ )], 145 {45%,  $M^+ - P(O)(OEt)_2$  and  $CN$ }, 107 {100%,  $M^+ - P(O)(OEt)_2$  and  $CH(CN)_2$ }.

#### **[1,1-Dicyanopentan-2-yl] phosphonic acid diethyl ester (11)**

Yellow liquid,  $R_f = 0.50$  (*n*-hexane/EtOAc: 1/1);  $^1H$  NMR (250 MHz,  $CDCl_3$ ):  $\delta$  1.00 (t, 3H,  $^3J_{HH} = 7.0$  Hz), 1.37 (t, 6H,  $^3J_{HH} = 7.0$  Hz), 1.61 (q, 2H,  $^3J_{HH} = 7.0$  Hz), 1.72-2.09 (m, 2H), 2.29-2.34 (m, 1H), 4.16-4.24 (m, 4H), 4.28-4.48 (m, 1H) ppm;  $^{13}C$  NMR (62 MHz,  $CDCl_3$ ):  $\delta$  13.7, 16.3 (d,  $^3J_{CP} = 5.6$  Hz), 20.7 (d,  $^2J_{CP} = 7.6$  Hz), 23.7, 29.2, 37.8 (d,  $^1J_{CP} = 144.9$  Hz), 63.2 (d,  $^2J_{CP} = 6.8$  Hz), 110.7 (d,  $^3J_{CP} = 5.0$  Hz), 112.2 (d,  $^3J_{CP} = 17.0$  Hz) ppm; MS (70 eV):  $m/z = 259$  [5%,  $M^+ + 1$ ], 138 [100%,  $HP(O)(OEt)_2$ ], 193 [35%,  $M^+ - (CN)_2$ ], 121 [20%,  $M^+ - P(O)(OEt)_2$ ].

#### **[1,1-Dicyanooctan-2-yl] phosphonic acid diethyl ester (12)**

Yellow liquid,  $R_f = 0.60$  (*n*-hexane/EtOAc: 1/1);  $^1H$  NMR (400 MHz,  $CDCl_3$ ):  $\delta$  0.81 (t, 3H,  $^3J_{HH} = 6.8$  Hz), 1.23-1.25 (m, 6H), 1.29 (t, 6H,  $^3J_{HH} = 7.2$  Hz), 1.44-1.50 (m, 2H), 1.66-1.78 (m, 1H), 1.85-1.98 (m, 1H), 2.24-2.34 (m, 1H), 4.07-4.16 (m, 4H), 4.36 (dd, 1H,  $^3J_{HP} = 13.2$  Hz,  $^3J_{HH} = 3.6$  Hz) ppm;  $^{13}C$  NMR (100 MHz,  $CDCl_3$ ) 13.8, 16.2 (d,  $^3J_{CP} = 5.0$  Hz), 22.3, 23.7, 27.1, 27.2 (d,  $^3J_{CP} = 6.0$  Hz), 28.8, 31.2, 37.7 (d,  $^1J_{CP} = 143.0$  Hz), 63.1 (d,  $^2J_{CP} = 7.0$  Hz), 111.1 (d,  $^3J_{CP} = 3.0$  Hz), 112.3 (d,  $^3J_{CP} = 17.0$  Hz) ppm; MS (70 eV):  $m/z = 301$  [1%,  $M^+ + 1$ ], 163 [16%,  $M^+ - P(O)(OEt)_2$ ], 137 [100%,  $P(O)(OEt)_2$ ]

#### **[1-(4-Chlorophenyl)-2,2-dicyanoethyl] phosphonic acid diisopropyl ester (13)**

Yellow solid, mp 111 °C;  $R_f = 0.62$  (*n*-hexane/EtOAc: 1/1);  $^1H$  NMR (400 MHz,  $CDCl_3$ ):  $\delta$  1.00 (d, 3H,  $^3J_{HH} = 6.4$  Hz), 1.32 (d, 3H,  $^3J_{HH} = 6.0$  Hz), 1.38 (d, 6H,  $^3J_{HH} = 6.0$  Hz), 3.51 (dd, 1H,  $^3J_{HH} = 7.2$  Hz,  $^2J_{HP} = 21.6$  Hz), 4.51-4.57 (m, 1H), 4.75-4.82 (m, 1H), 7.43-7.50 (m, 4H) ppm;  $^{13}C$  NMR (75 MHz,  $CDCl_3$ ):  $\delta$  23.1 (d,  $^3J_{CP} = 6.0$  Hz), 23.8 (d,  $^3J_{CP} = 5.2$  Hz), 23.9, 24.2, 25.7, 44.4

(d,  $^1J_{CP} = 144.7$  Hz), 72.9 (d,  $^2J_{CP} = 7.5$  Hz), 73.8 (d,  $^2J_{CP} = 7.5$  Hz), 111.1 (d,  $^3J_{CP} = 11.2$  Hz), 111.4 (d,  $^3J_{CP} = 11.2$  Hz), 129.1 (d,  $J_{CP} = 5.2$  Hz), 129.6, 130.9 (d,  $J_{CP} = 6.7$  Hz), 135.7 ppm; MS (70 eV):  $m/z = 354$  [16%,  $M^+$ ], 356 [5%,  $M^+ + 2$ ], 189 [16%,  $M^+ - P(O)(O-i-Pr)_2$ ], 191 [5%, ( $M^+ + 2) - P(O)(O-i-Pr)_2$ ], 163 {100%,  $M^+ - [P(O)(O-i-Pr)_2$  and CN]}, 165 {34%, ( $M^+ + 2) - [P(O)(O-i-Pr)_2$  and CN]}.

**[1-(4-Chlorophenyl)-2,2-dicyanoethyl] phosphonic acid dimethyl ester (14)**

White solid, mp 118 °C;  $R_f = 0.31$  (*n*-hexane/EtOAc: 1/1);  $^1H$  NMR (400 MHz,  $CDCl_3$ ):  $\delta$  3.60-3.68 (m, 4H), 3.85 (d, 3H,  $^3J_{HP} = 11.2$  Hz), 4.51 (t, 1H,  $^3J_{HH} = 8.0$  Hz), 7.50 (s, 4H) ppm;  $^{13}C$  NMR (75 MHz,  $CDCl_3$ ):  $\delta$  25.4, 43.4 (d,  $^1J_{CP} = 144.0$  Hz), 53.7 (d,  $^2J_{CP} = 7.5$  Hz), 54.6 (d,  $^2J_{CP} = 6.7$  Hz), 111.2 (d,  $^3J_{CP} = 10.5$  Hz), 111.3 (d,  $^3J_{CP} = 11.2$  Hz), 129.5, 129.7, 130.7 (d,  $J_{CP} = 6.4$  Hz), 135.8 ppm; MS (70 eV):  $m/z = 298$  [6%,  $M^+$ ], 300 [2%,  $M^+ + 2$ ], 189 [6%,  $M^+ - P(O)(OMe)_2$ ], 191 [2%, ( $M^+ + 2) - P(O)(OMe)_2$ ], 109 [100%,  $P(O)(OMe)_2$ ].

**[1-(4-Chlorophenyl)-2-cyano-2-ethylcarboxylic acid ethyl ester] phosphonic acid diethyl ester (15; mixture of two diastereoisomers, ratio ~ 68:32)**

Light yellow liquid,  $R_f = 0.46$  (*n*-hexane/EtOAc: 1/1);  $^1H$  NMR (400 MHz,  $CDCl_3$ ):  $\delta$  1.10-1.15 (m, 2H), 1.19-1.30 (m, 6H), 1.34 (t, 1H,  $^3J_{HH} = 7.2$  Hz), 3.74-3.85 (m, 1H), 3.96-4.21 (m, 6H), 4.27 (dd, 1H,  $^3J_{HH} = 6.0$  Hz,  $^3J_{HP} = 8.4$  Hz), 7.33-7.35 (m, 3H), 7.44-7.47 (m, 1H) ppm;  $^{13}C$  NMR (75 MHz,  $CDCl_3$ ):  $\delta$  13.5, 13.6, 16.0-16.1, 39.0, 39.1, 42.7 (d,  $^1J_{CP} = 142.5$  Hz), 43.3 (d,  $^1J_{CP} = 142.5$  Hz), 62.9 (d,  $^2J_{CP} = 6.7$  Hz), 63.0 (d,  $^2J_{CP} = 6.7$  Hz), 63.1 (d,  $^2J_{CP} = 5.2$  Hz), 63.25, 63.6 (d,  $^2J_{CP} = 6.7$  Hz), 114.5 (d,  $^3J_{CP} = 9.0$  Hz), 114.7 (d,  $^3J_{CP} = 4.5$  Hz), 128.8, 130.1 (d,  $^3J_{CP} = 6.0$  Hz), 130.7 (d,  $^3J_{CP} = 6.7$  Hz), 130.9 (d,  $^3J_{CP} = 6.0$  Hz), 131.1 (d,  $^3J_{CP} = 6.0$  Hz), 134.3, 134.5, 163.9 (d,  $^3J_{CP} = 12.0$  Hz), 164.0 (d,  $^3J_{CP} = 13.5$  Hz) ppm; MS (70 eV):  $m/z = 373$  [43%,  $M^+$ ], 375 [14%,  $M^+ + 2$ ], {302 [35%, ( $M^+ + 2) - CO_2Et$ ]}, 300 [100%,  $M^+ - CO_2Et$ ].



#### 4) $^1\text{H}$ NMR and $^{13}\text{C}$ NMR spectra of $\beta$ -phosphonomalonates

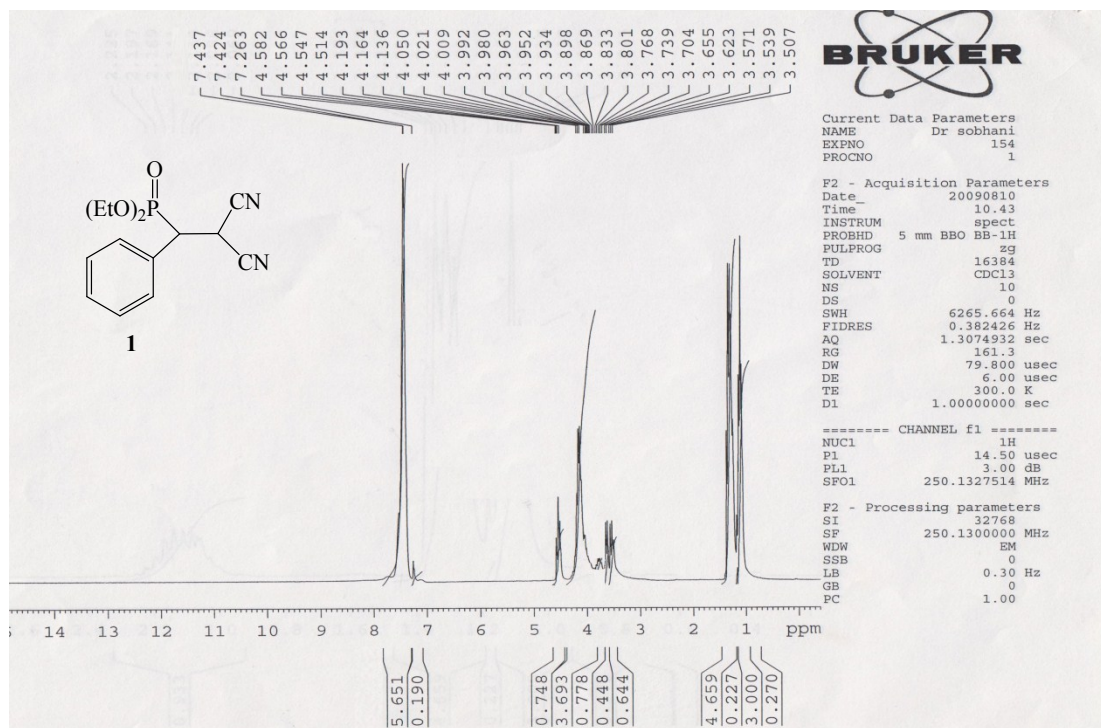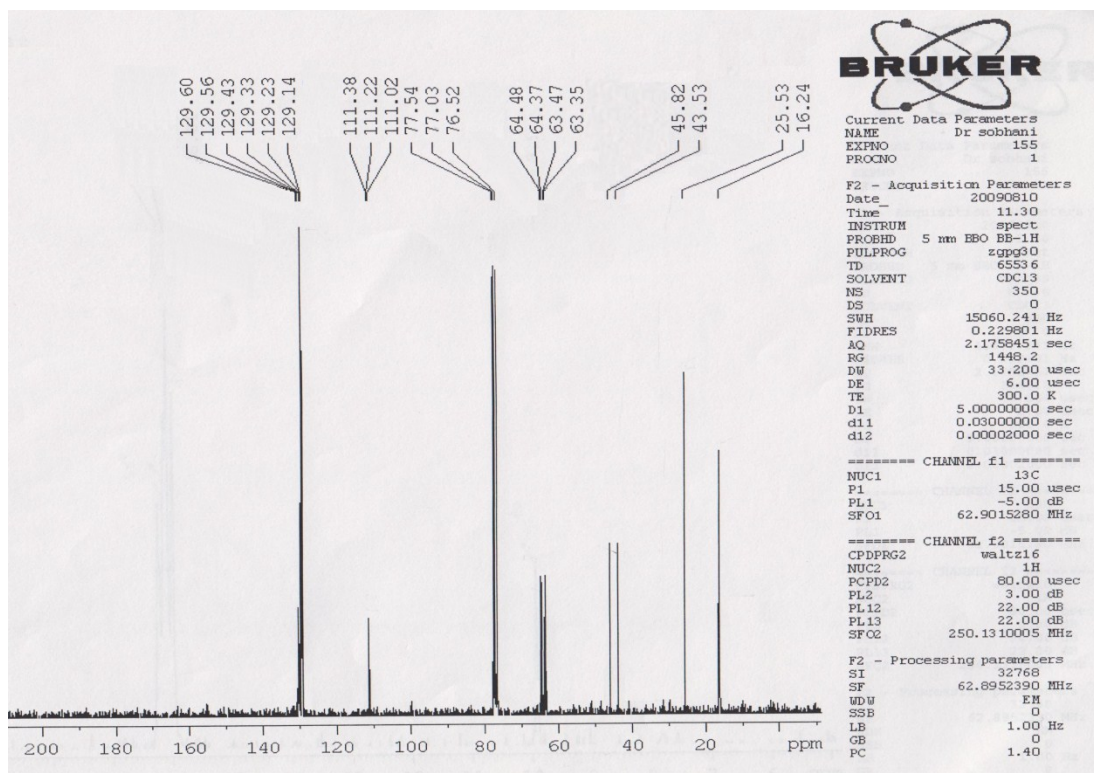

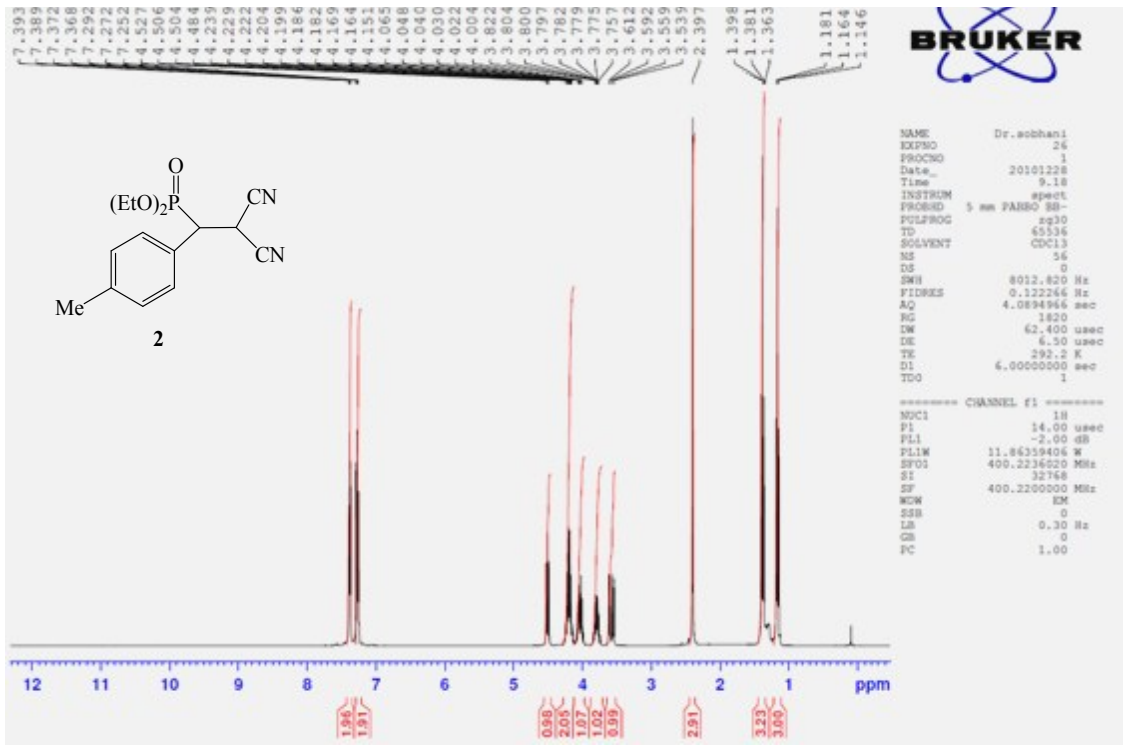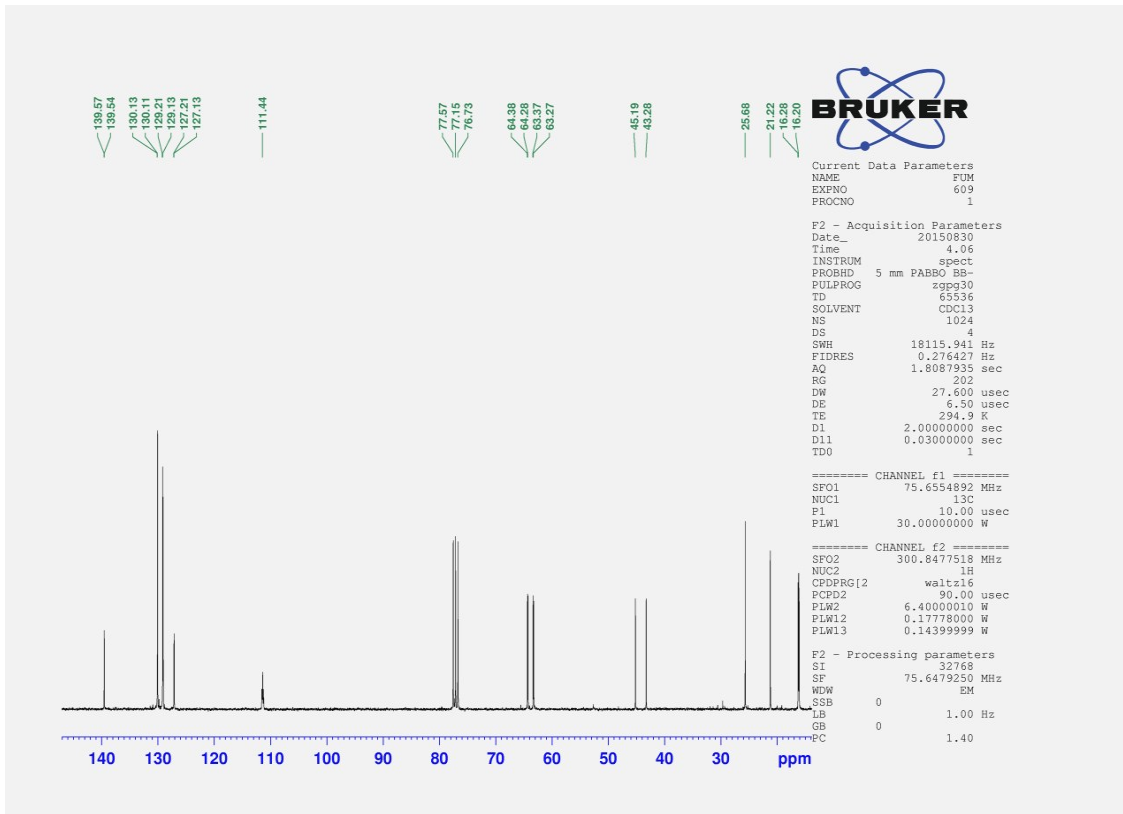

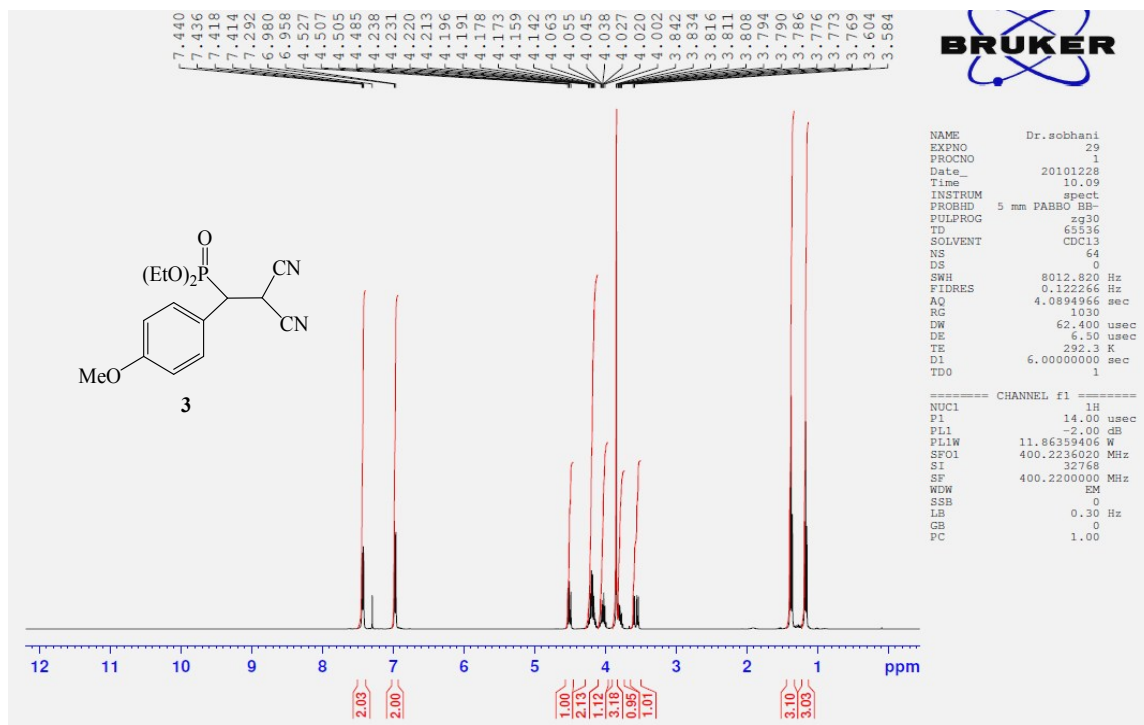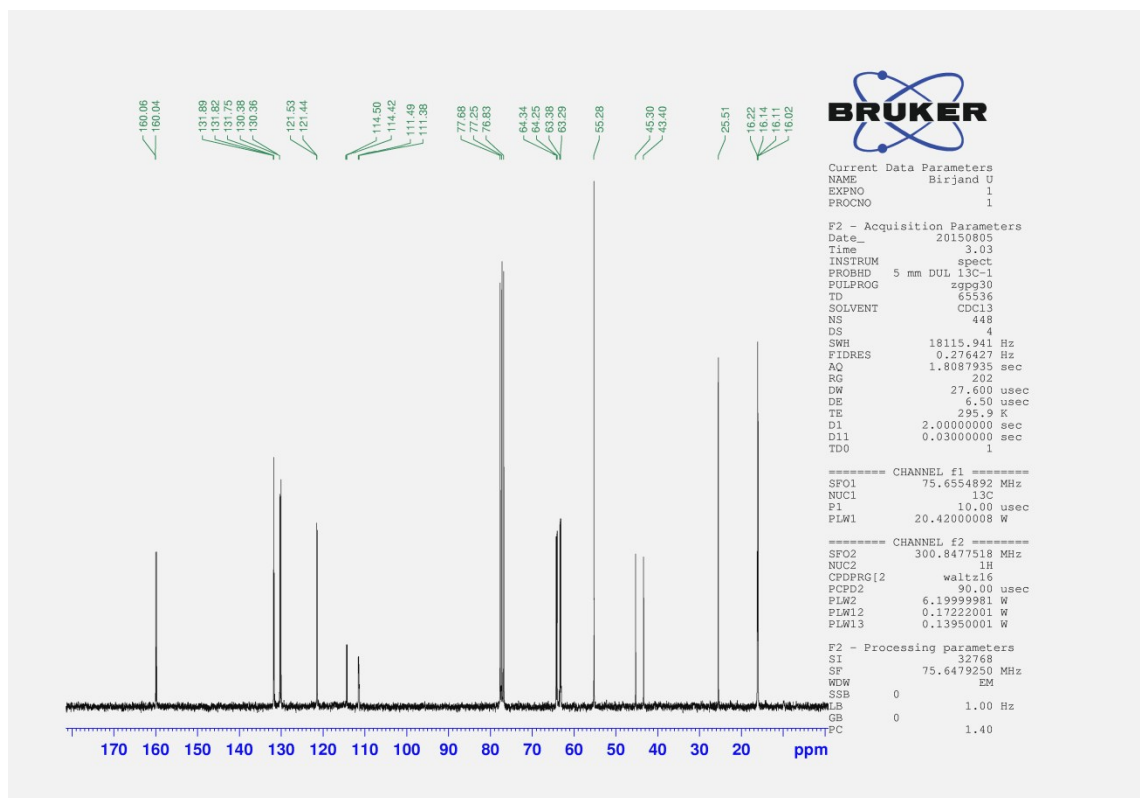

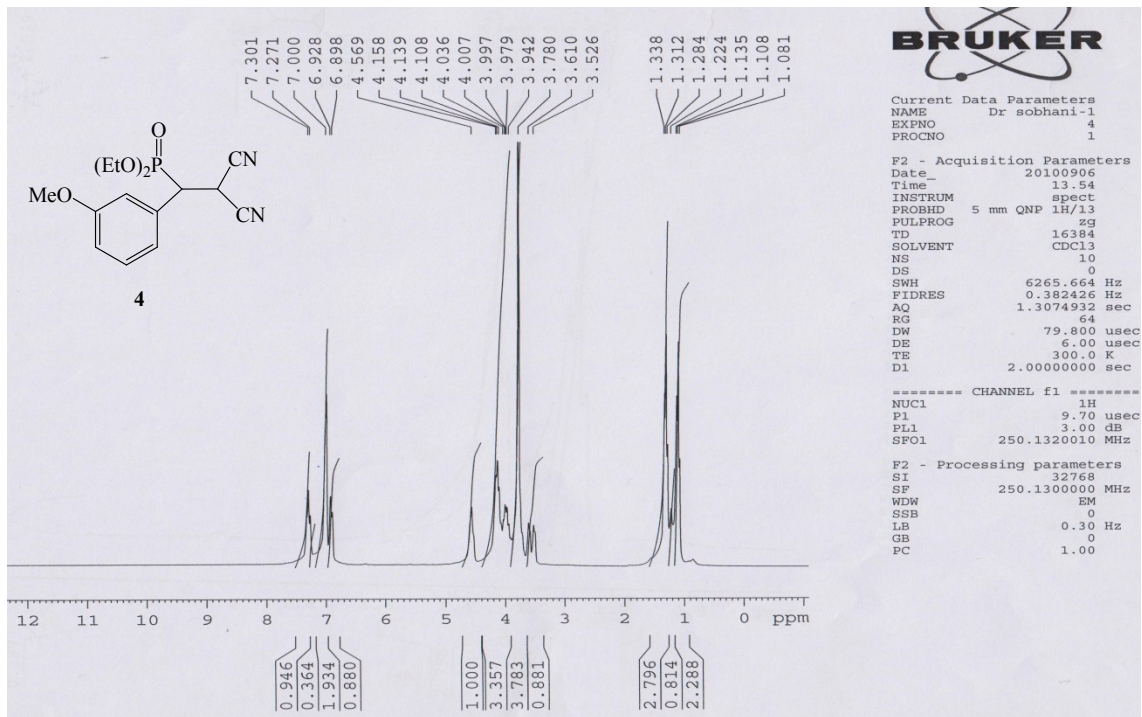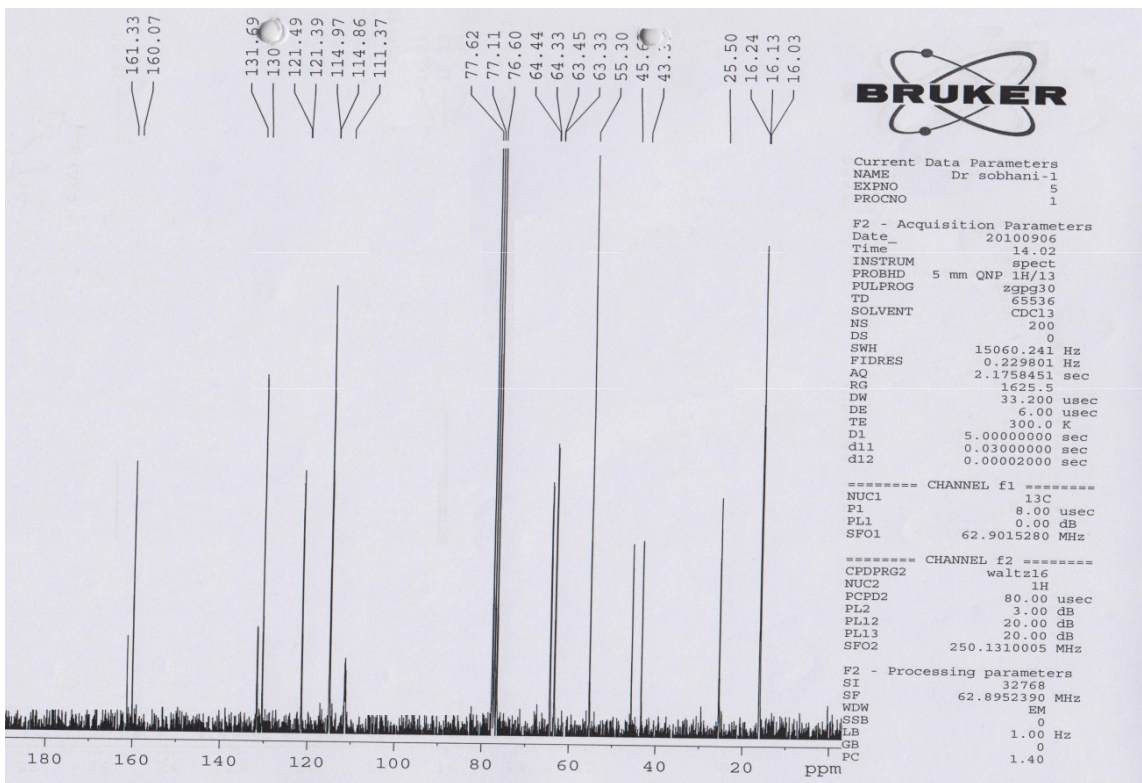

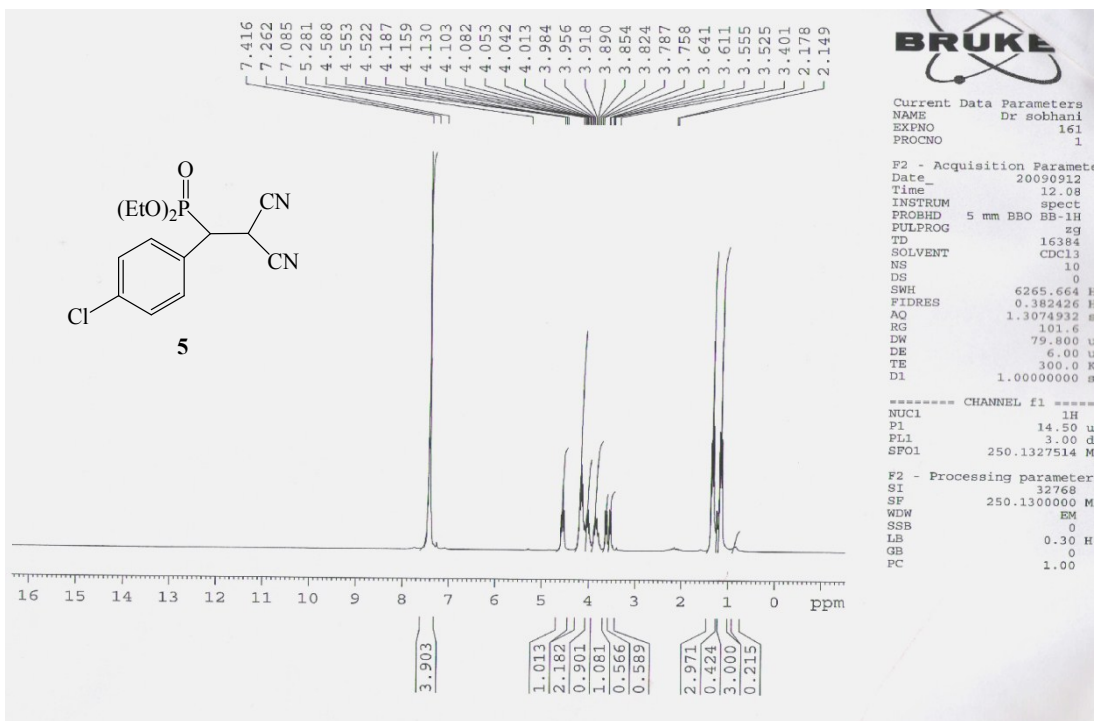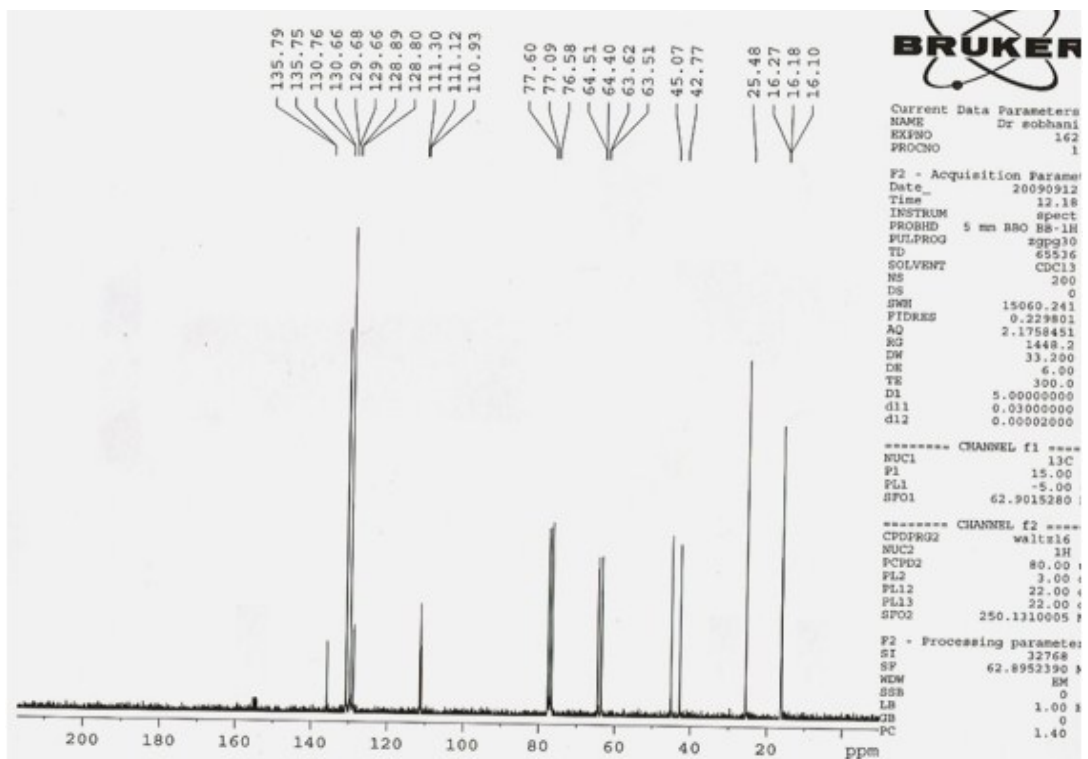

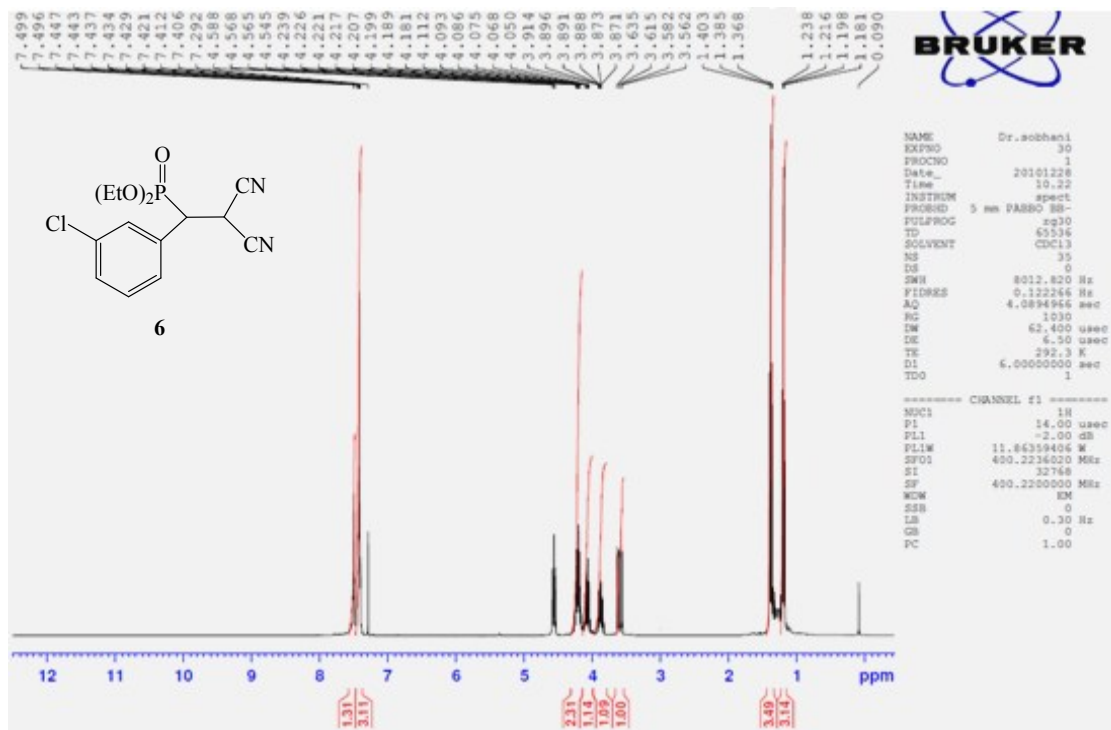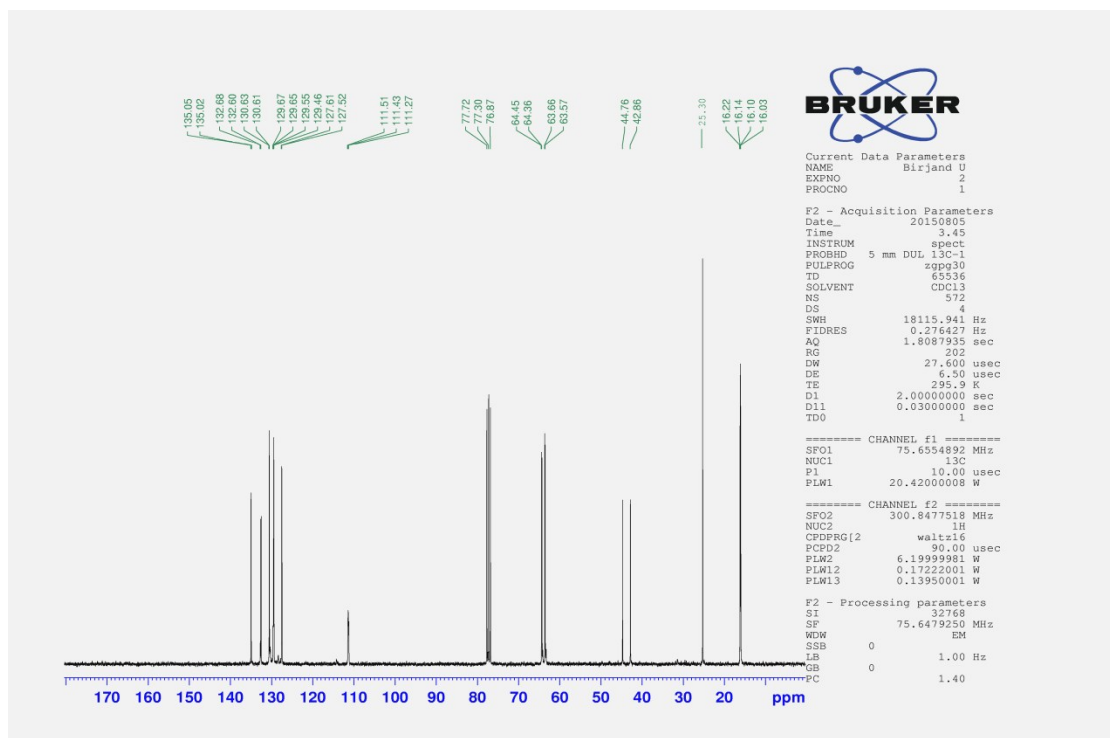

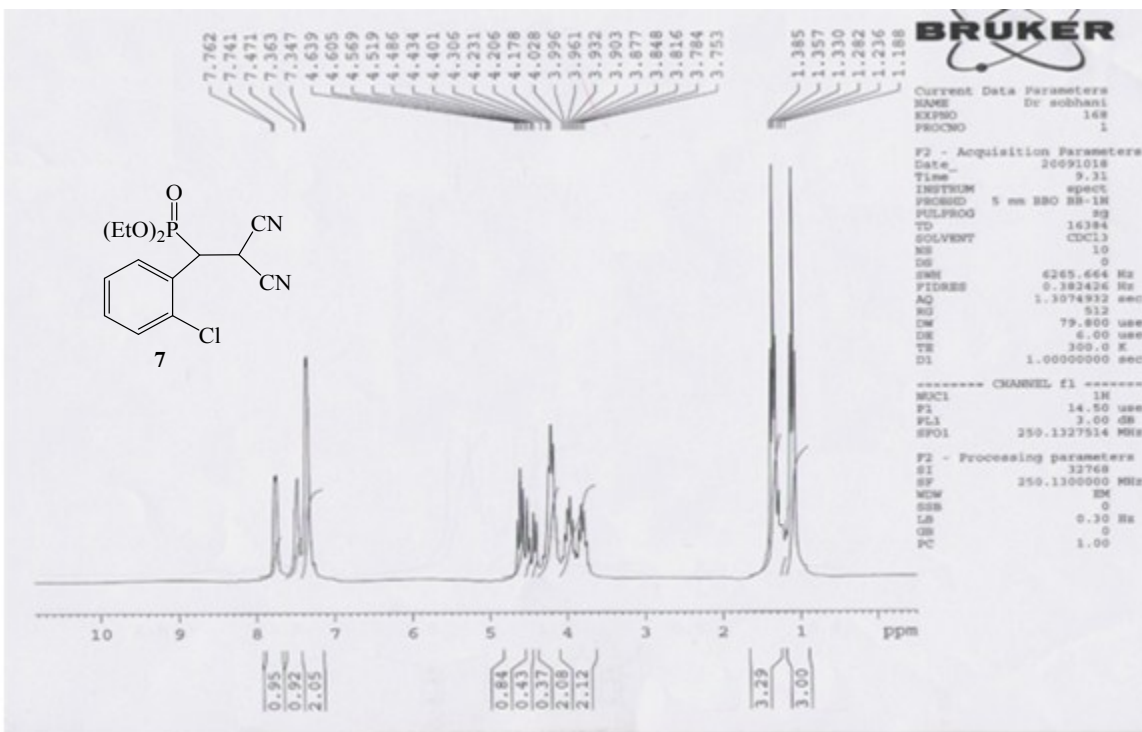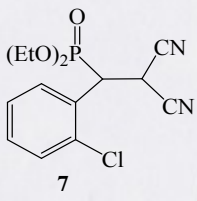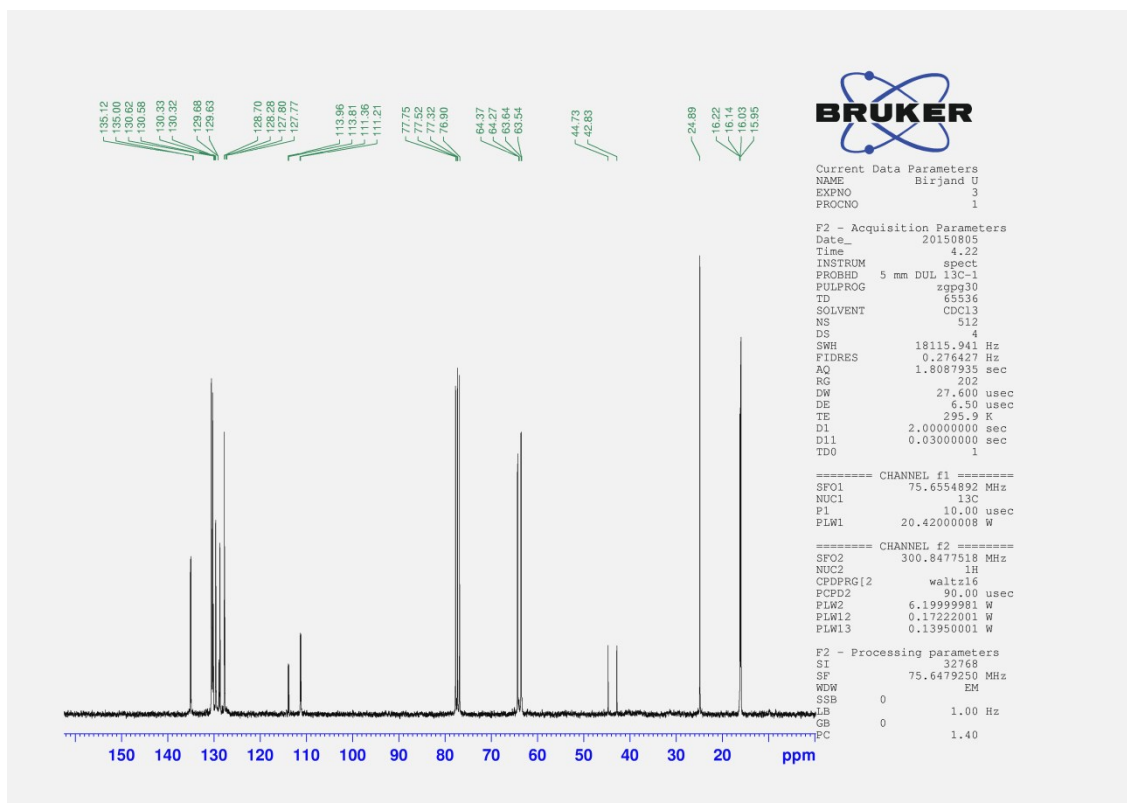

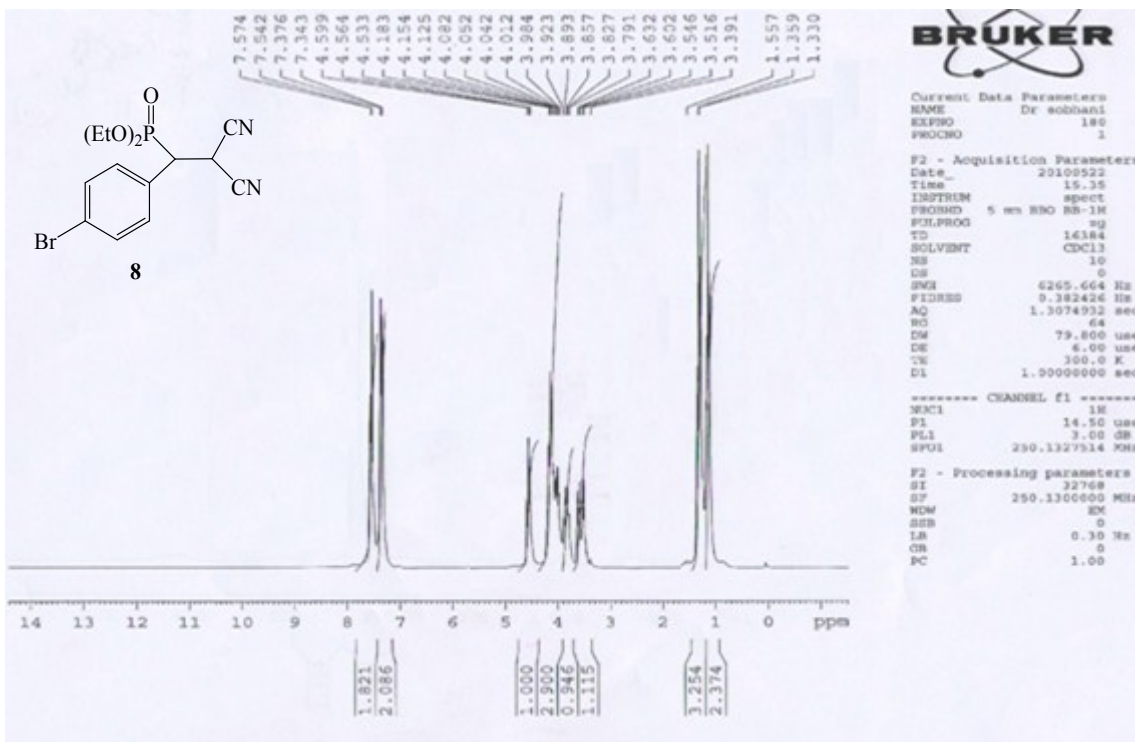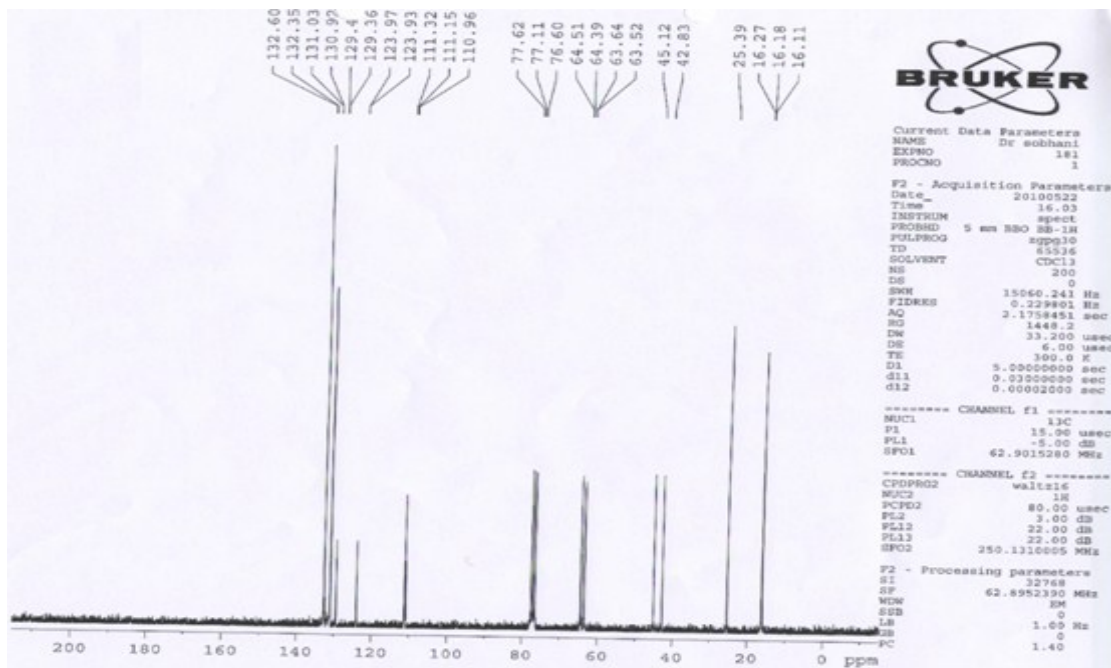



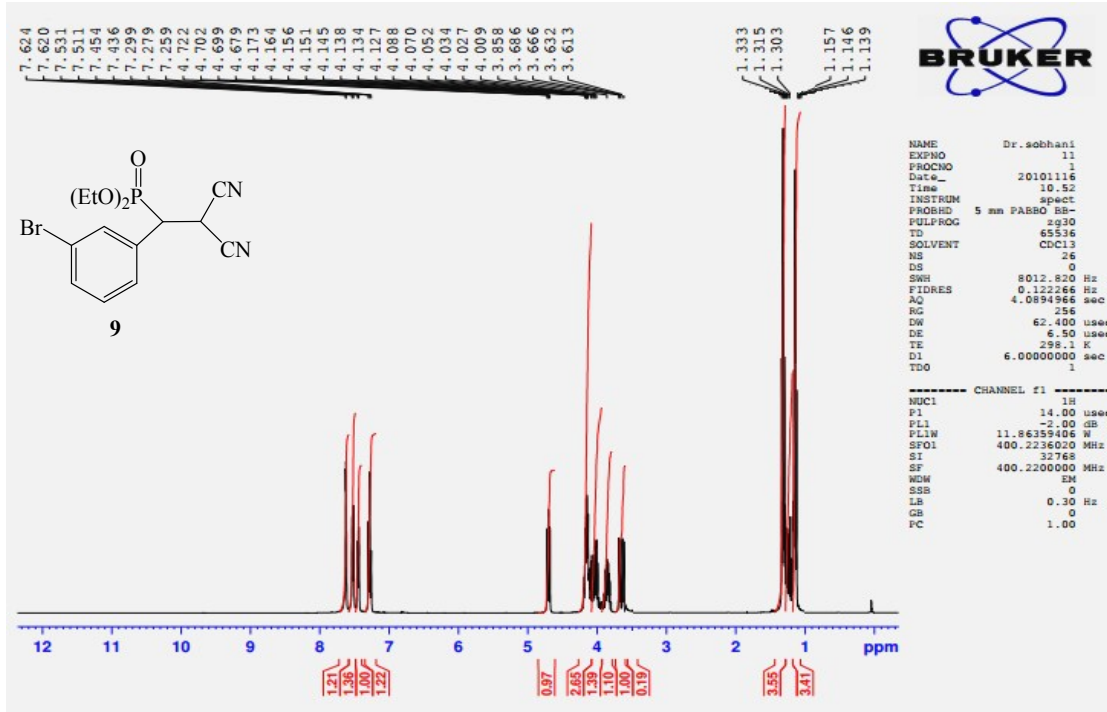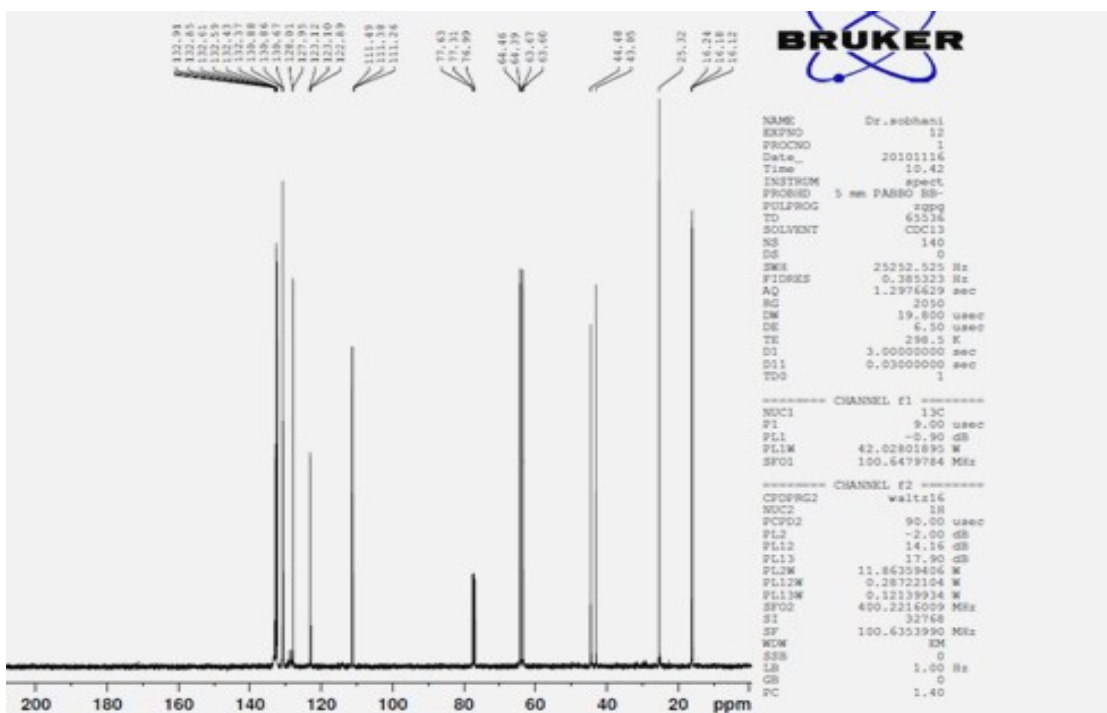

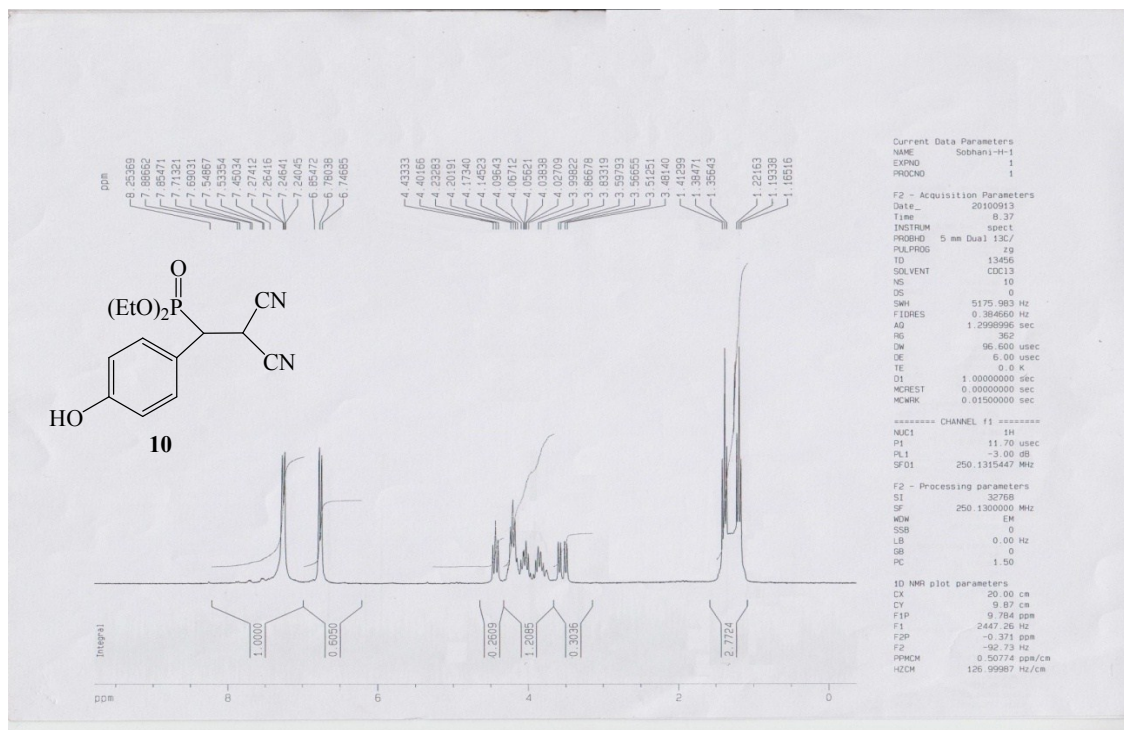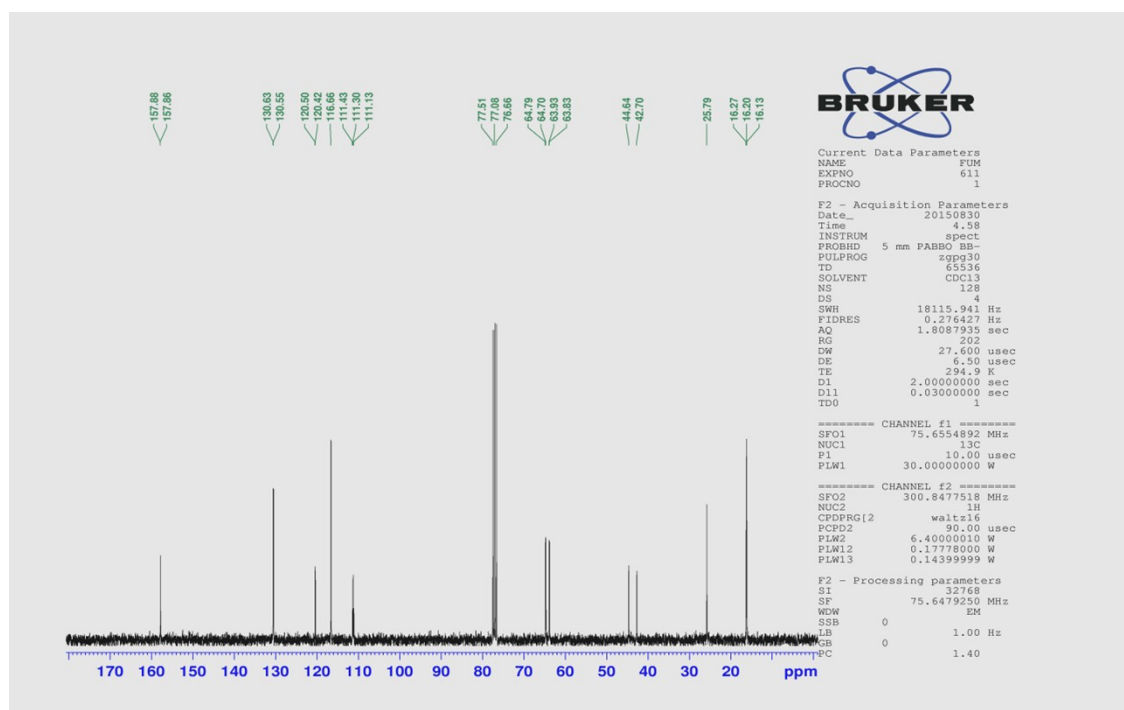

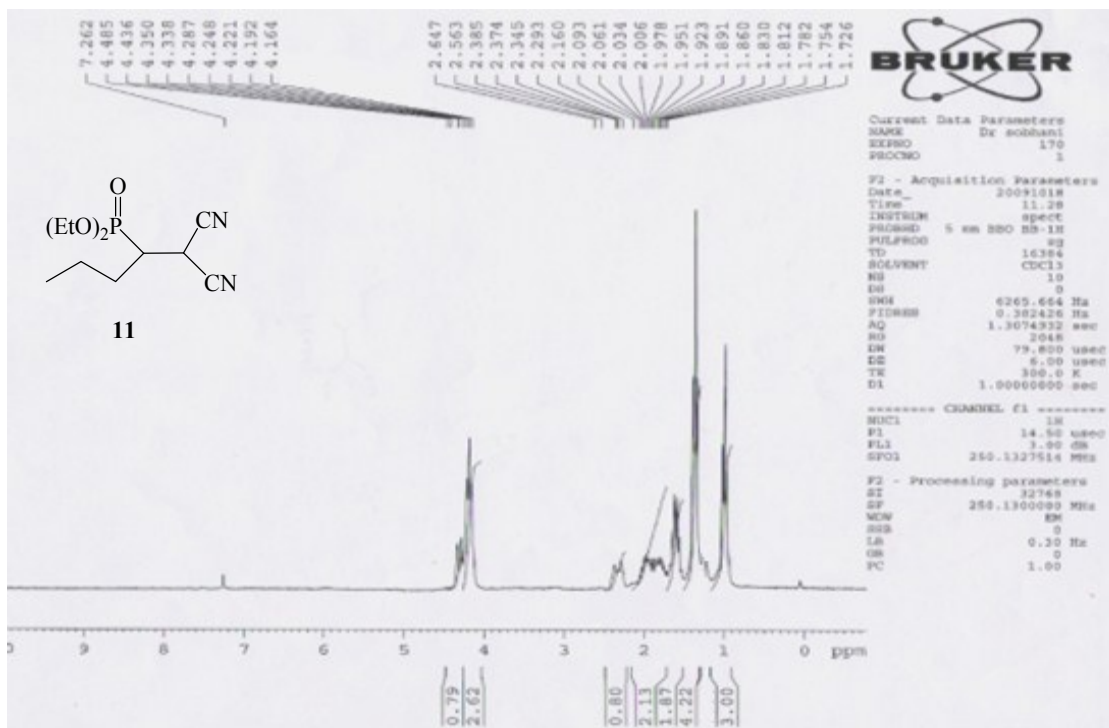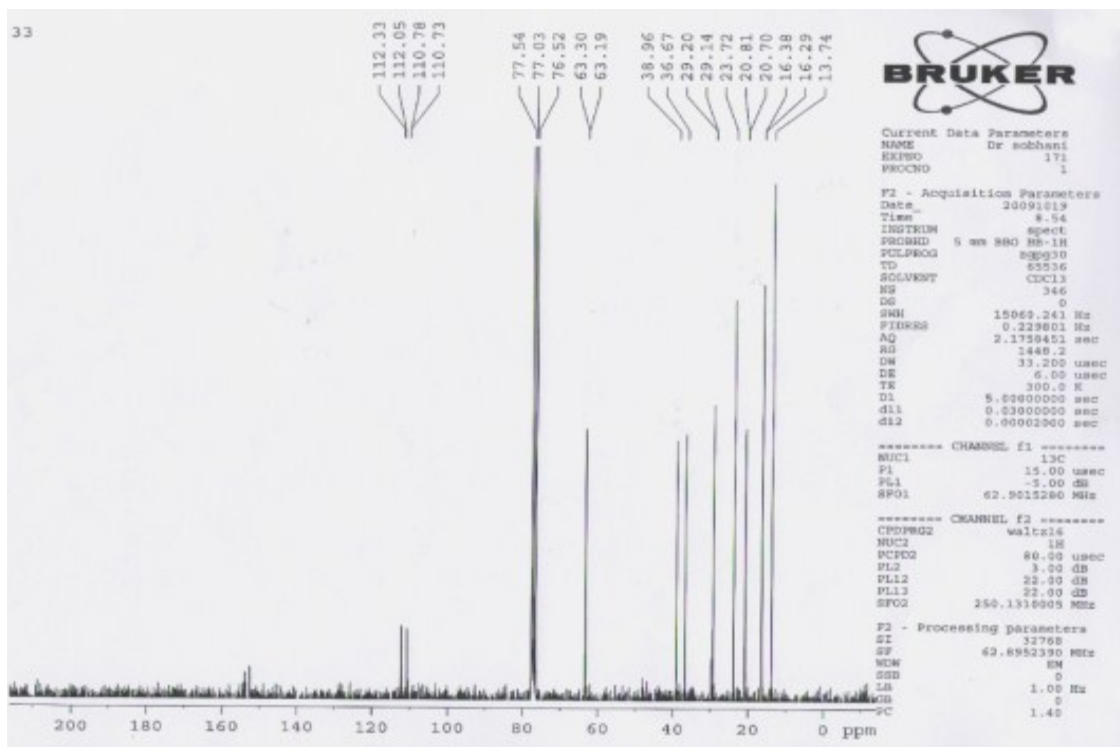

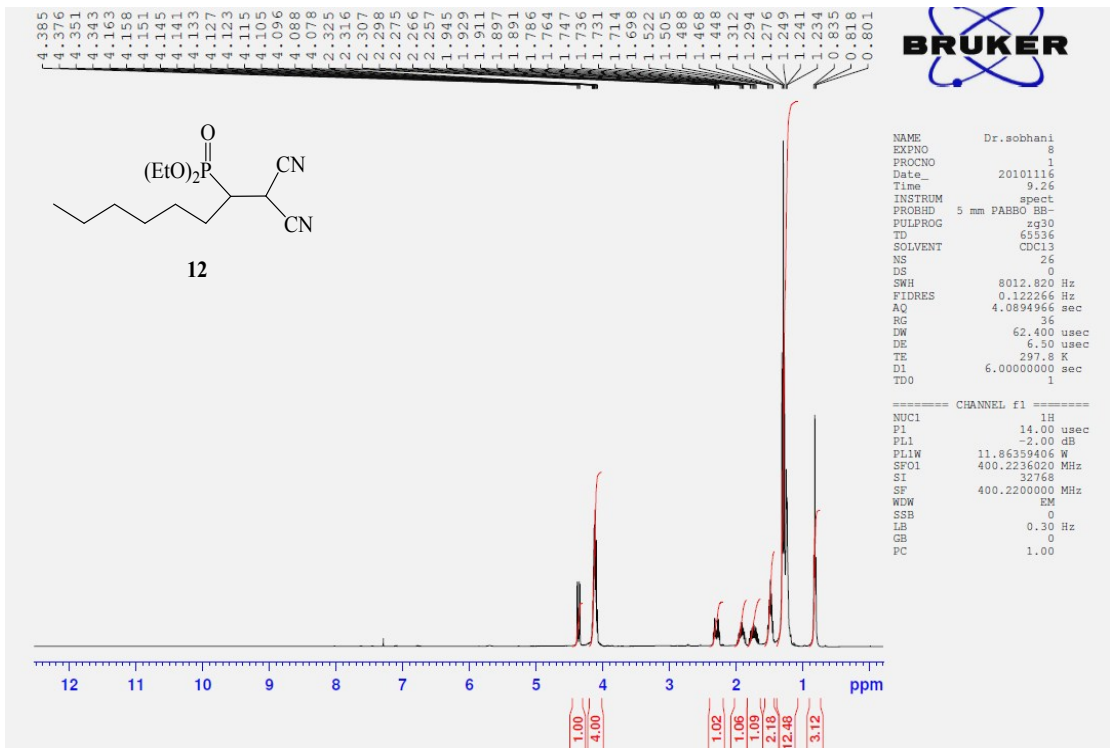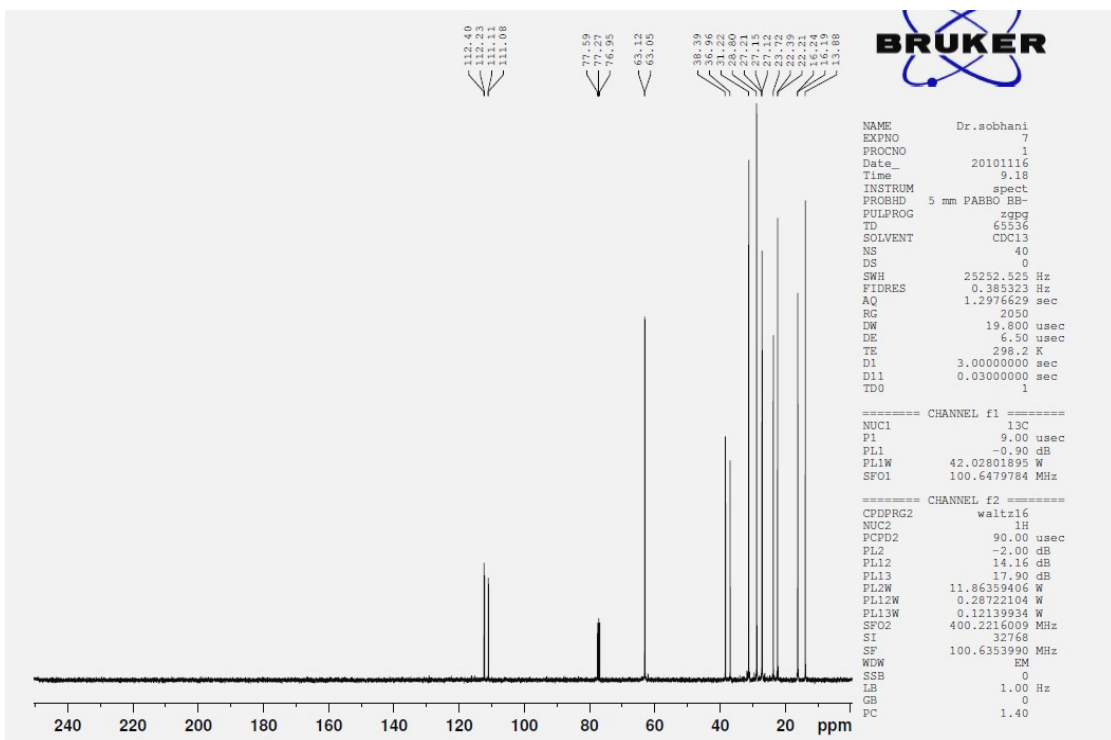

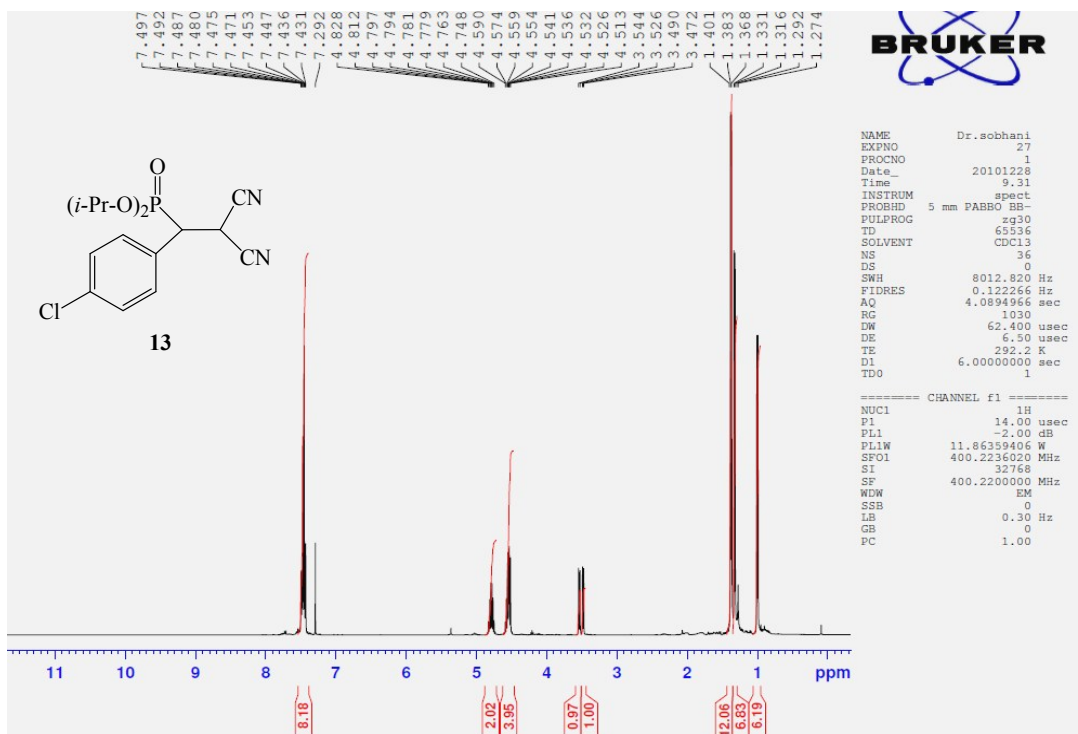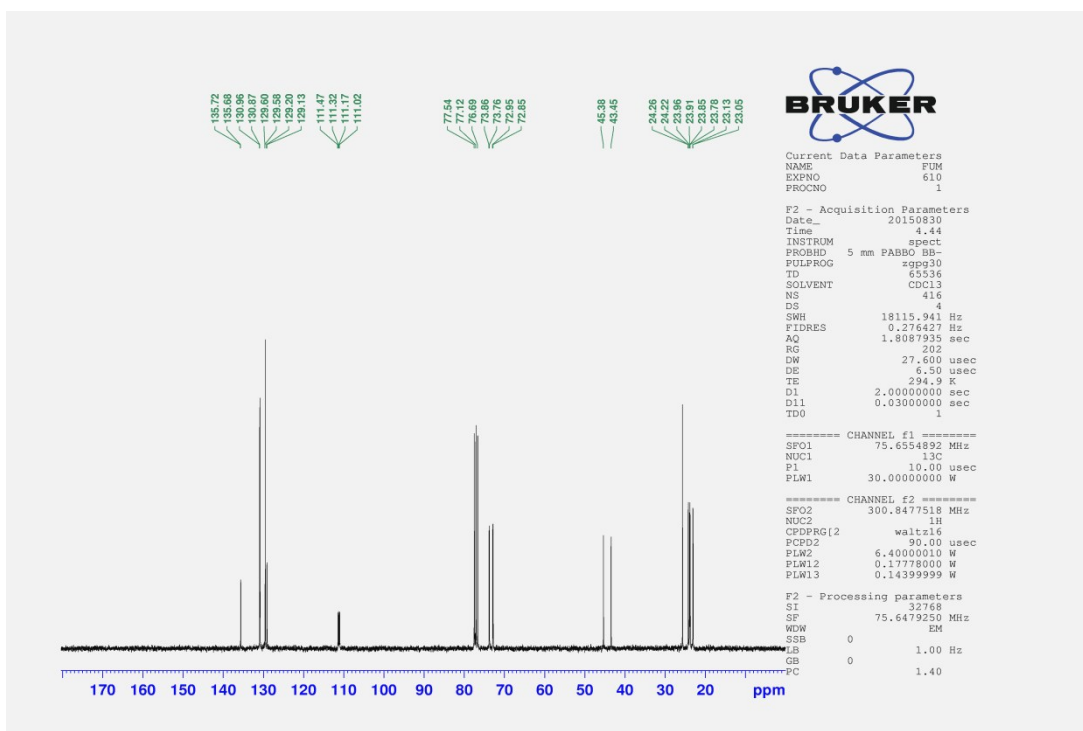

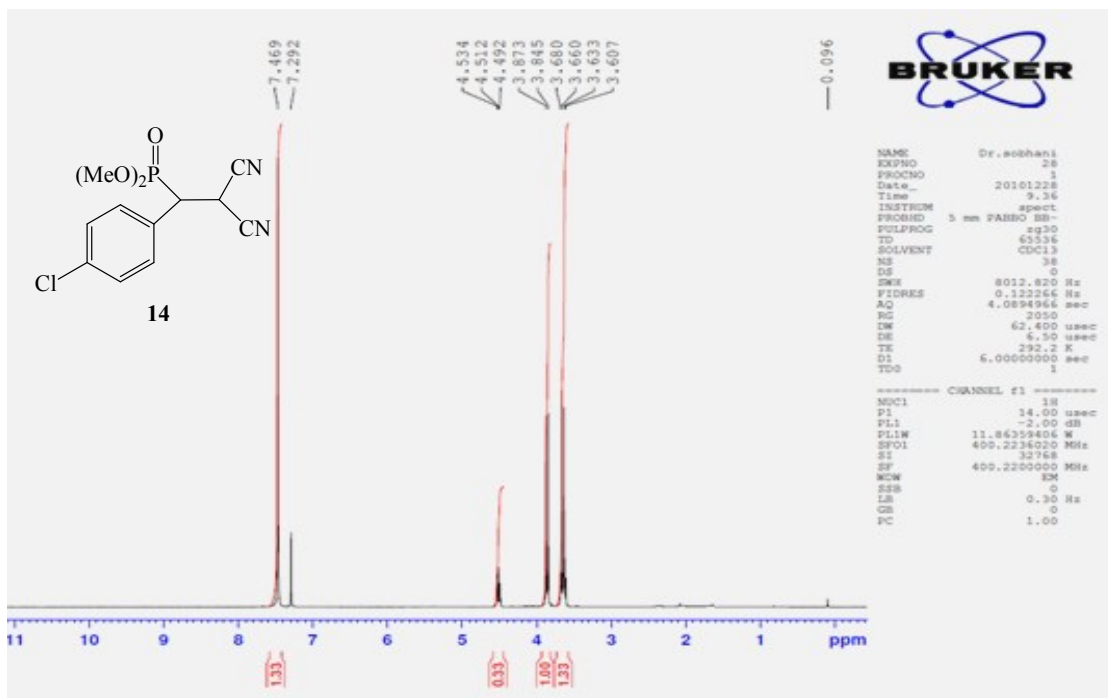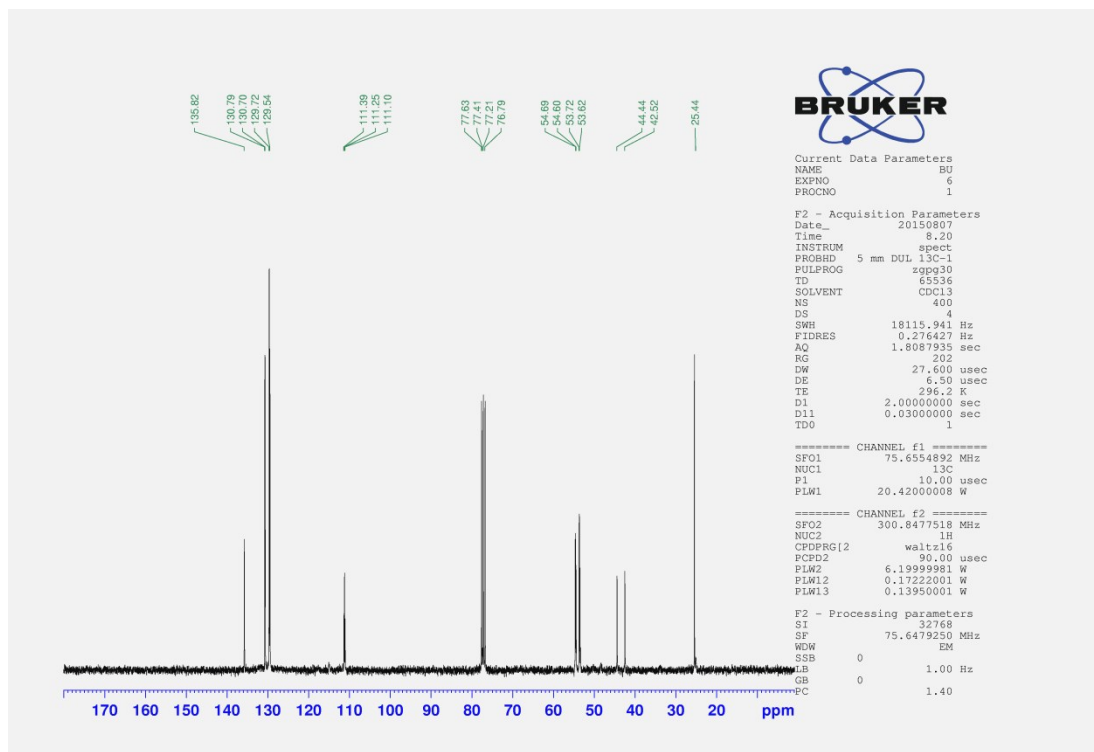

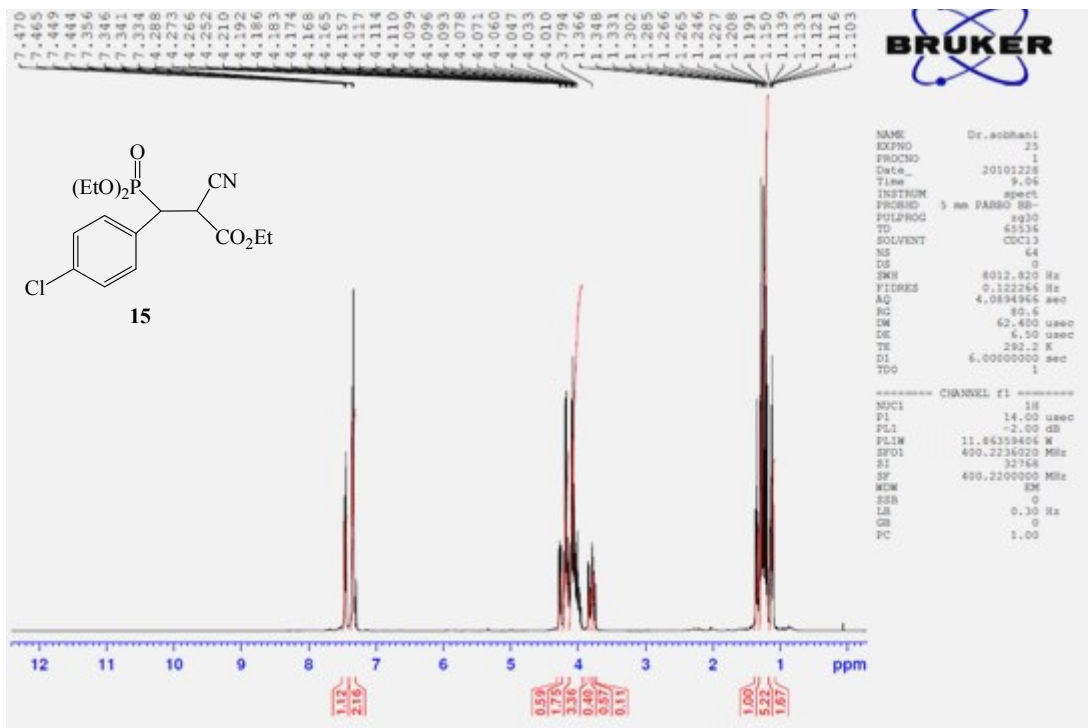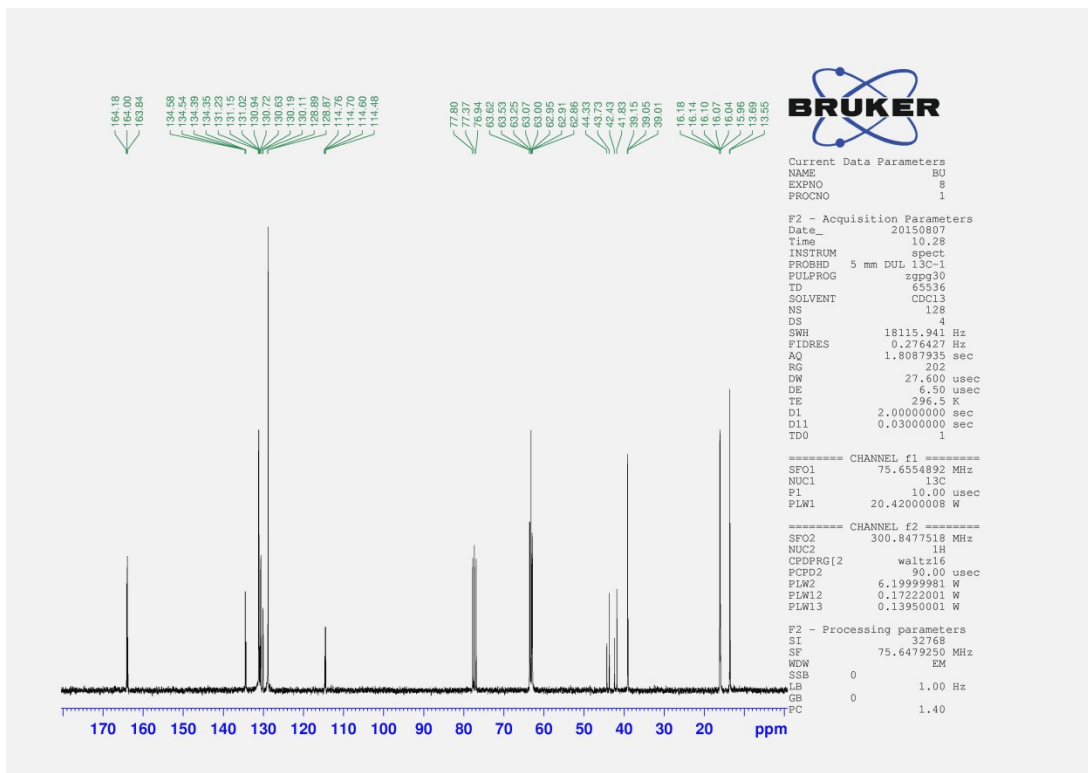

### 5) Mass spectra of $\beta$ -phosphonomalonates

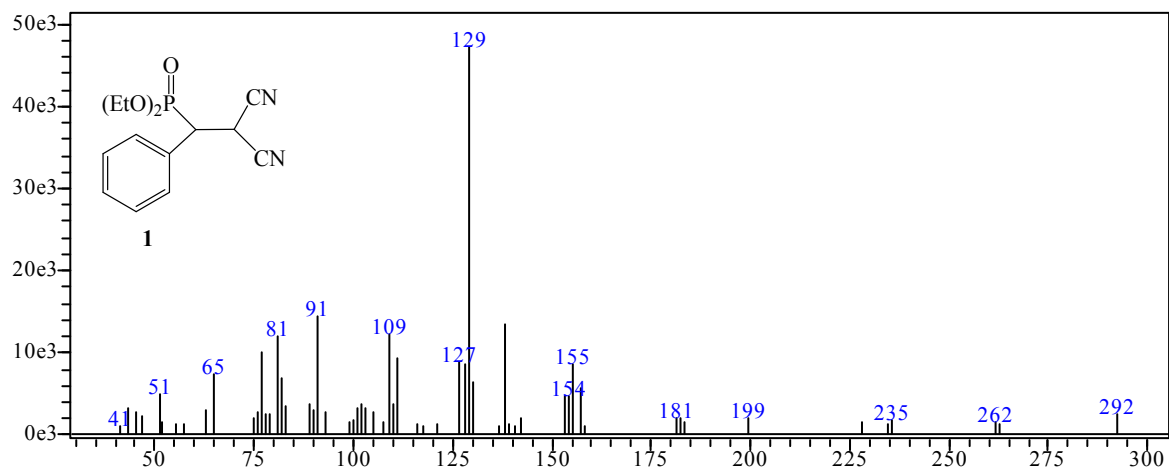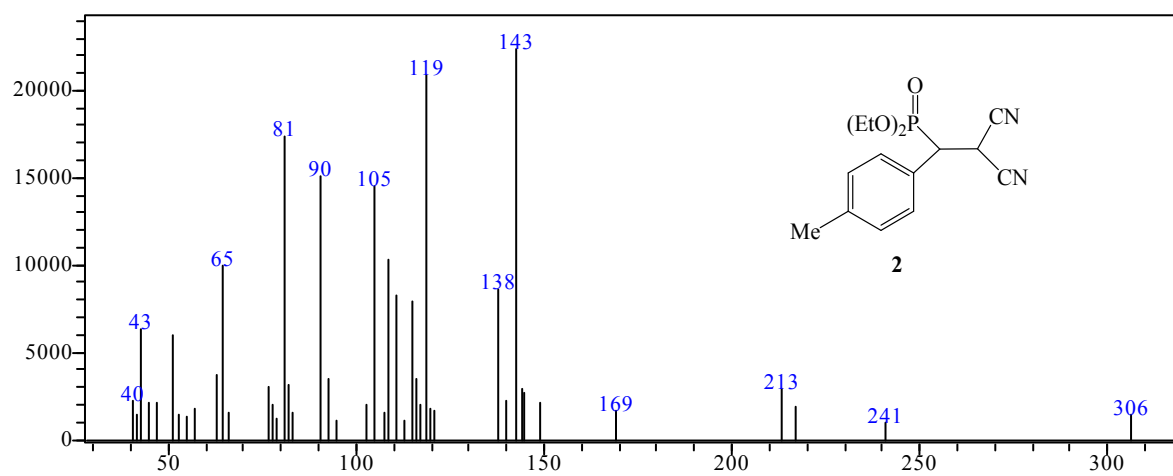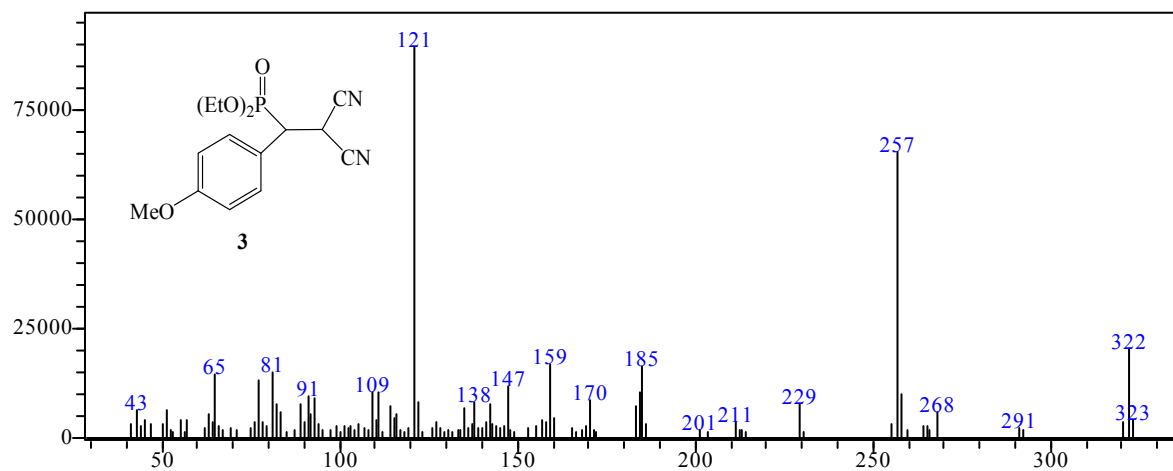



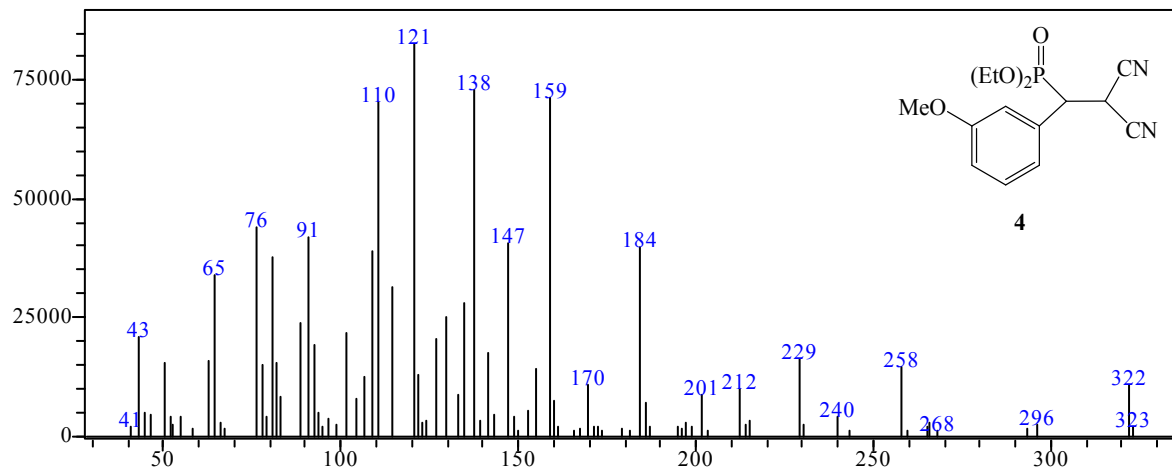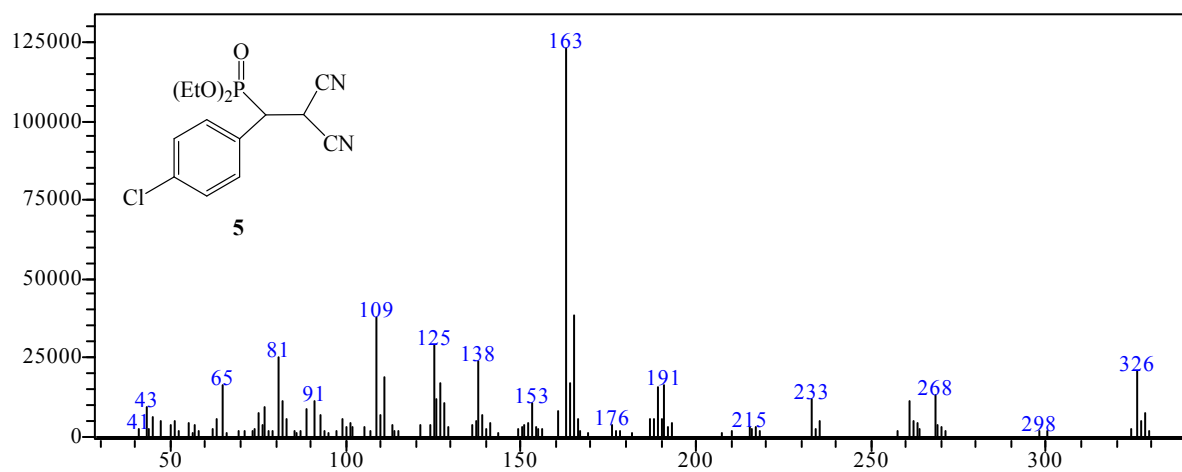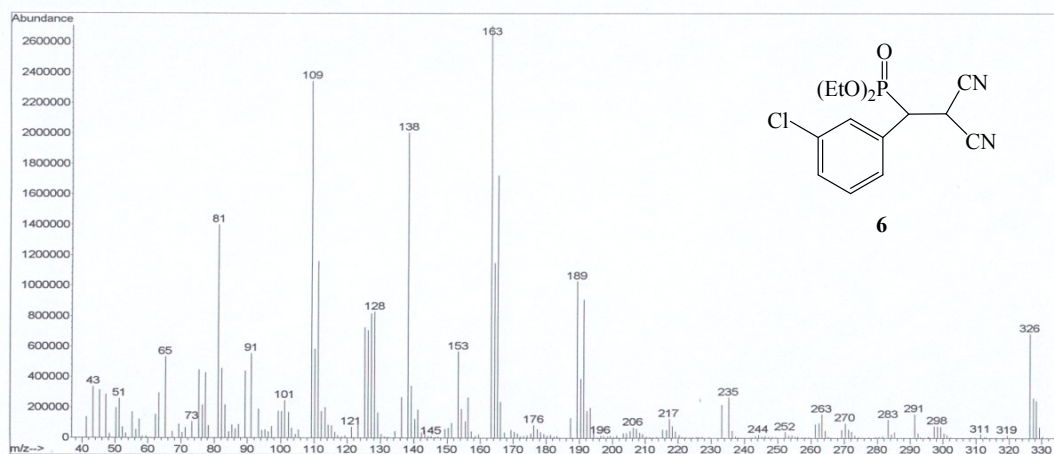

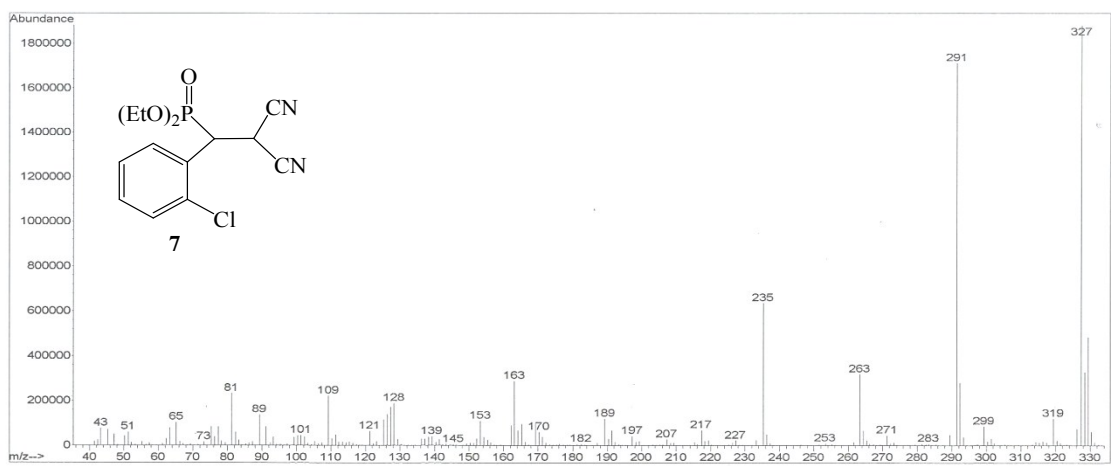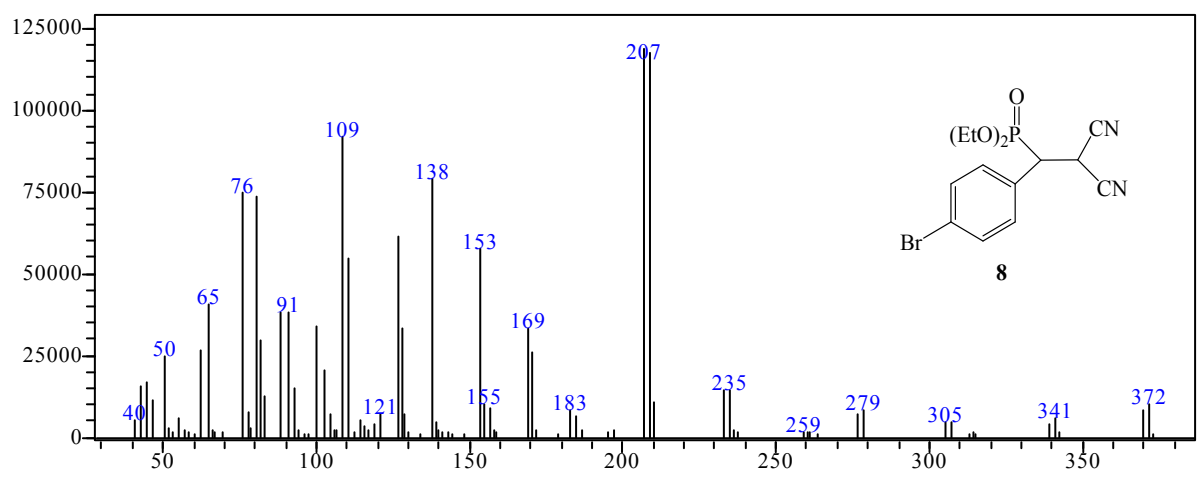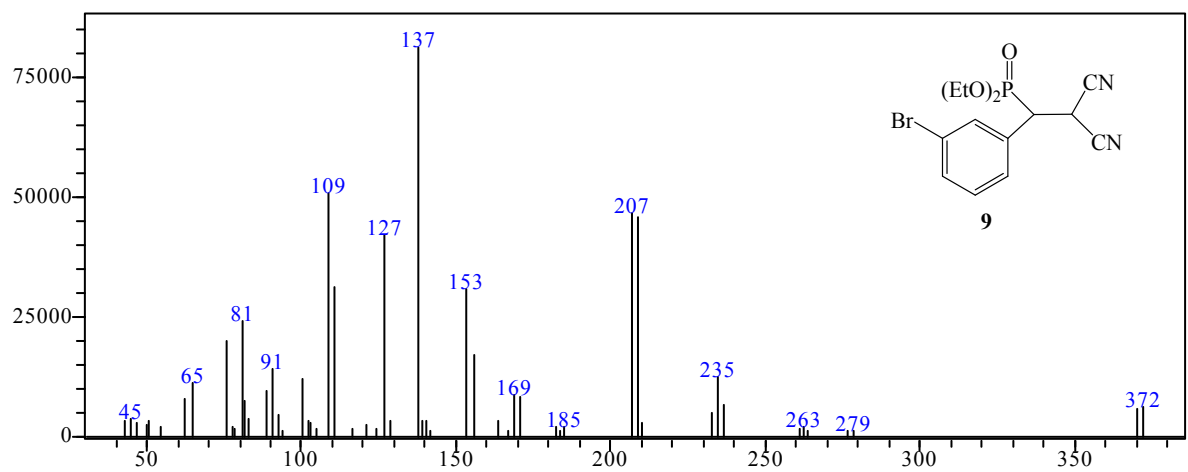

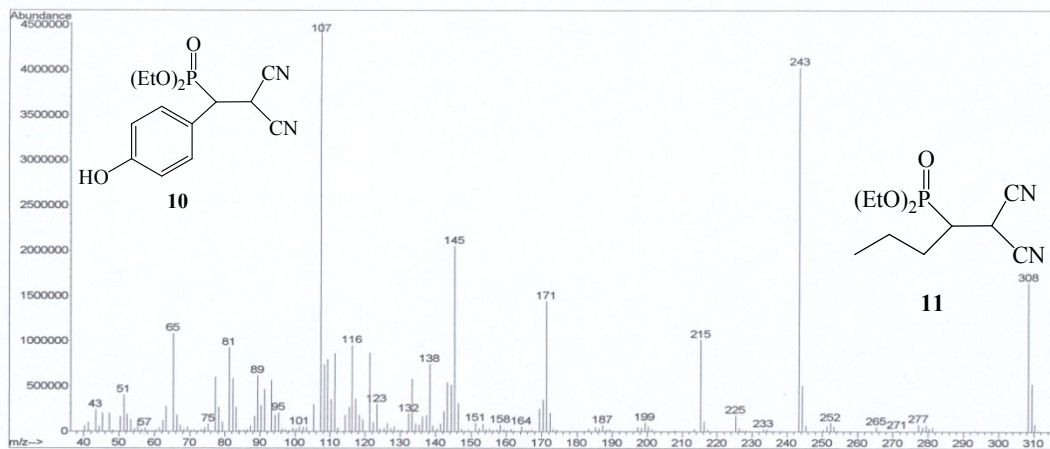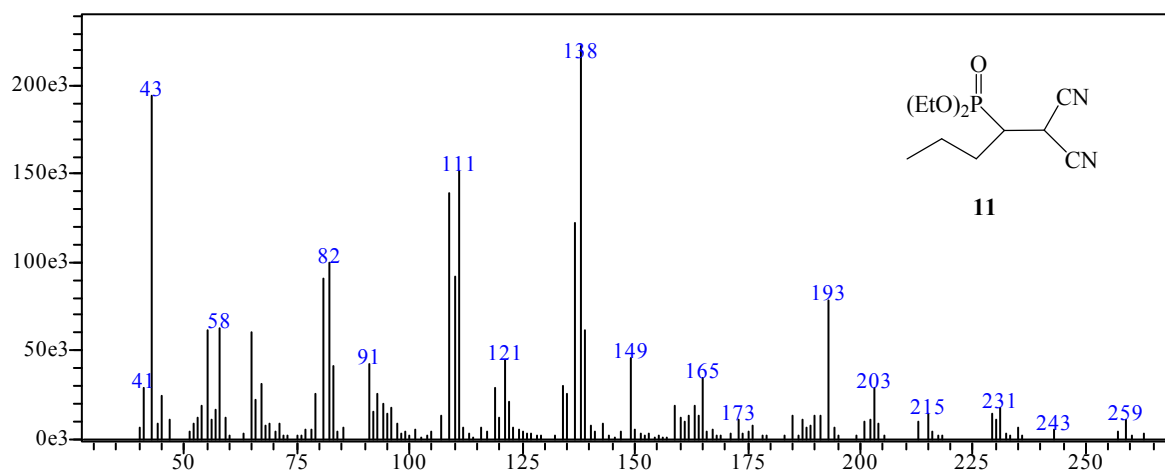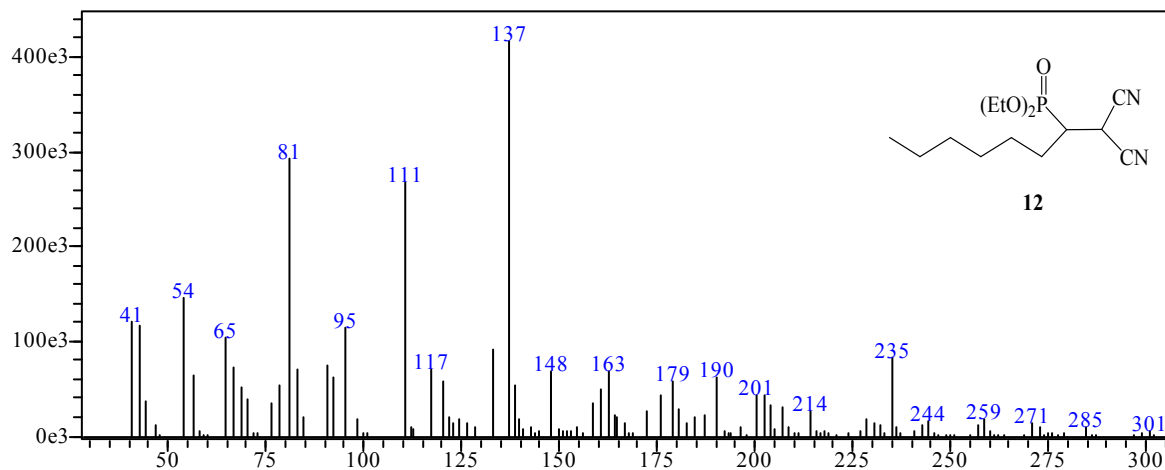

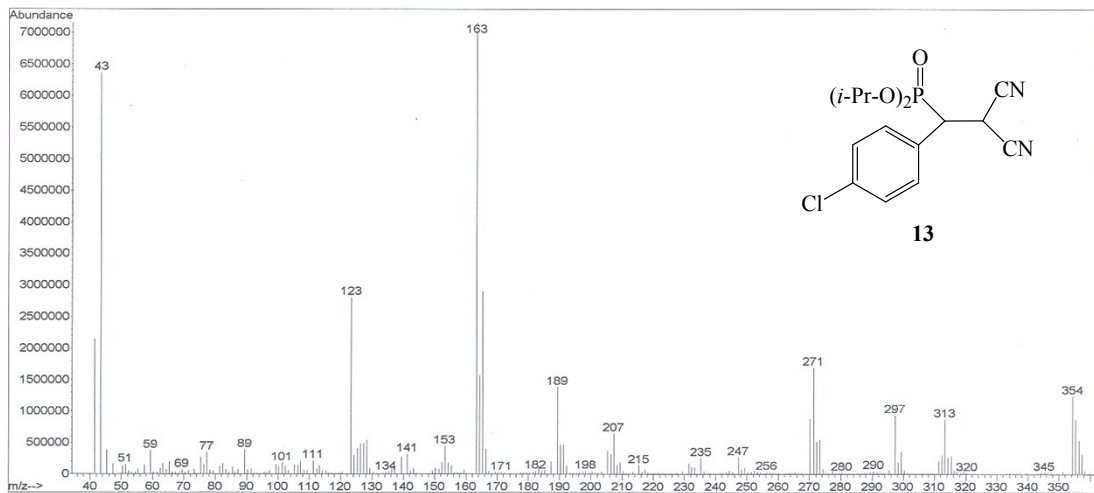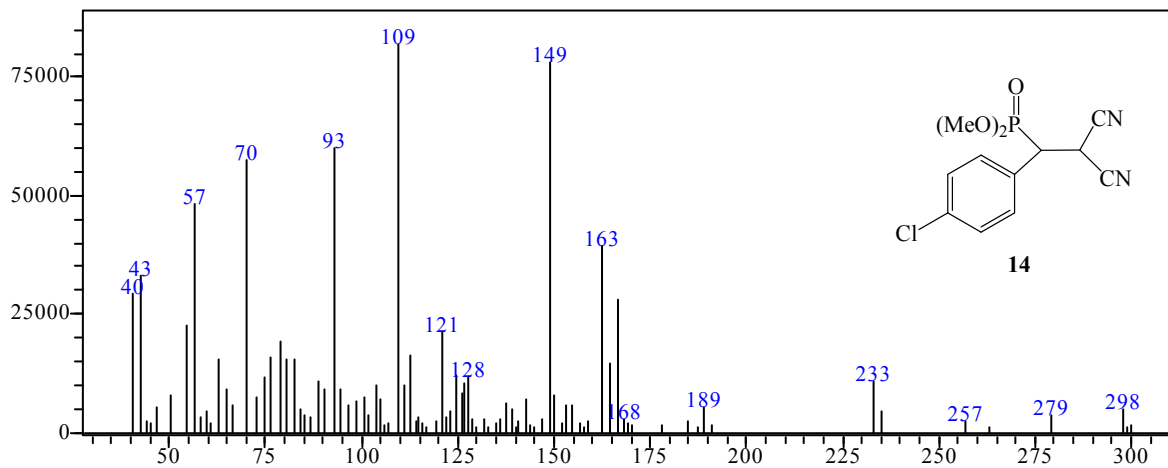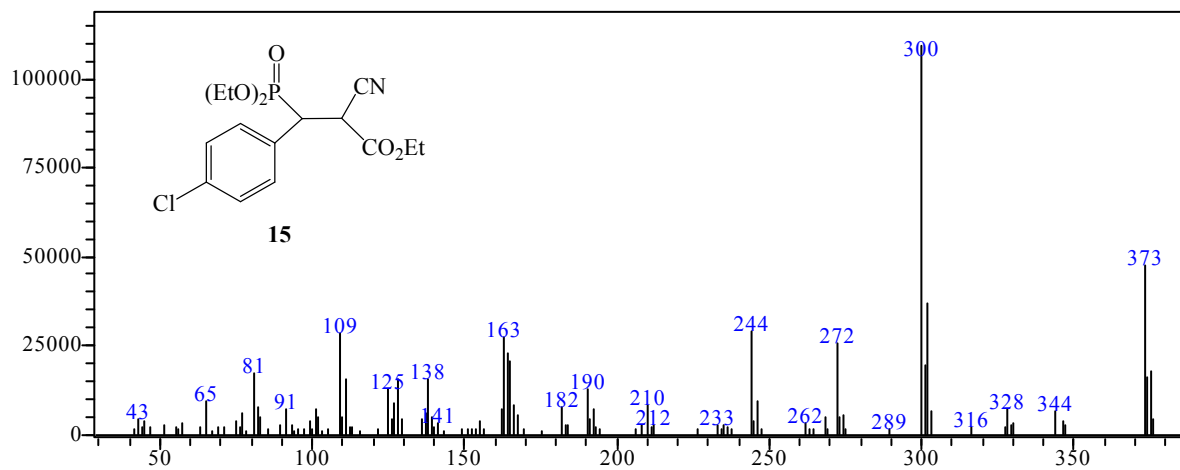

Supplement: c5ra13083b1.pdf [file c5ra13083b1.pdf]
